# Supplementary material for: Characterization of holmium(iii)-acetylacetonate complexes derived from therapeutic microspheres by infrared ion spectroscopy
Source: Royal Society of Chemistry journal article supplement (doi:10.1039/d0cp01890b), 2020-01-01
Supplement: d0cp01890b1.pdf [file d0cp01890b1.pdf]

## ARTICLE – SUPPORTING INFORMATION

### Characterization of Holmium(III)-Acetylacetonate Complexes Derived from Therapeutic Microspheres by Infrared Ion Spectroscopy

Kas J. Houthuijs,<sup>a</sup> Jonathan Martens,<sup>\*a</sup> Alexandra G. Arranja,<sup>b,c,d</sup> Giel Berden,<sup>a</sup> J. Frank W. Nijsen,<sup>c,d</sup> and Jos Oomens<sup>\*a,e</sup>

- Radboud University, Institute for Molecules and Materials, FELIX Laboratory, Toernooiveld 7, 6525ED Nijmegen, The Netherlands. E-mail: [jonathan.martens@ru.nl](mailto:jonathan.martens@ru.nl), [j.oomens@science.ru.nl](mailto:j.oomens@science.ru.nl)
- Department of Pharmaceutics, Utrecht Institute for Pharmaceutical Sciences (UIPS), Utrecht University, PO Box 80082, 3508 TB Utrecht, The Netherlands.
- Radboudumc, Department of Radiology and Nuclear Medicine, Geert Grooteplein Zuid 10, 6525 GA Nijmegen, The Netherlands.
- Quirem Medical B.V., Zutphenseweg 55, 7418 AH Deventer, The Netherlands.
- van't Hoff Institute for Molecular Sciences, University of Amsterdam, Science Park 908, 1098 XH Amsterdam, The Netherlands.

#### Supporting Information

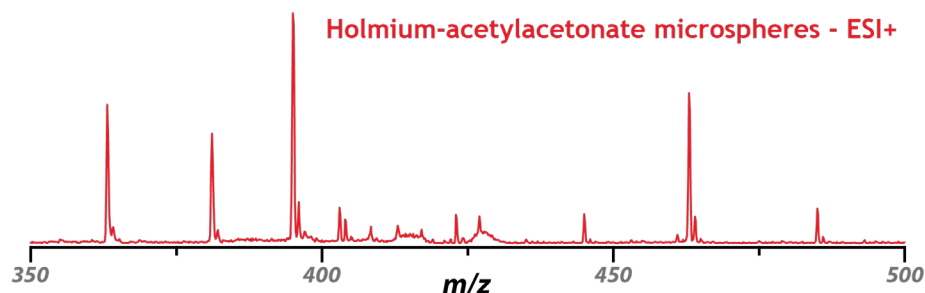

Figure S1. Mass spectrum (ESI+) of the holmium-acetylacetonate microspheres.

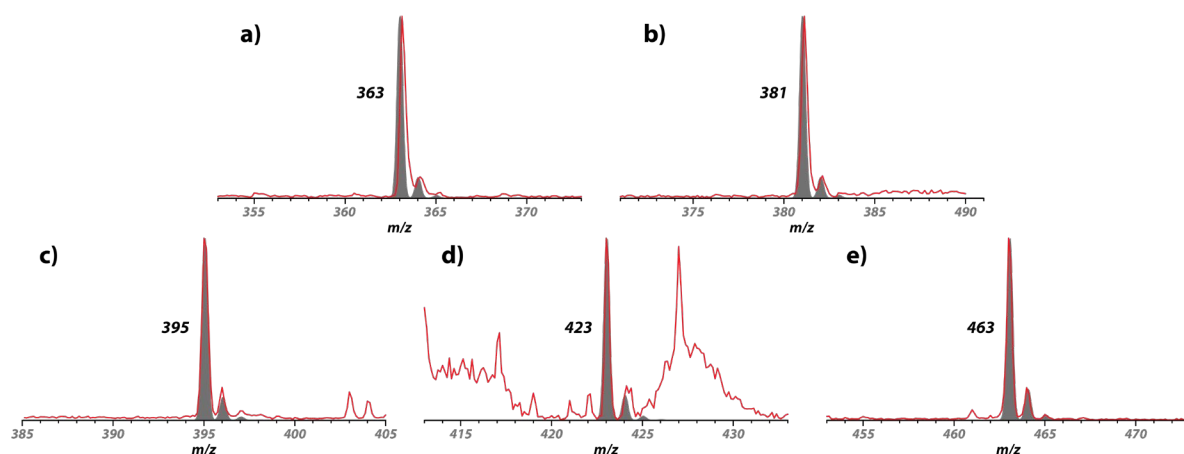

Figure S2. Mass spectra (red) of the complexes under investigation overlaid with a simulation of the isotope pattern of the assigned complexes (grey):  $[\text{Ho}(\text{acac})_2 - 2\text{H}]^+$  (a),  $[\text{Ho}(\text{acac})_2(\text{H}_2\text{O}) - 2\text{H}]^+$  (b),  $[\text{Ho}(\text{acac})_2(\text{MeOH}) - 2\text{H}]^+$  (c),  $[\text{Ho}(\text{acac})_2(\text{CH}_3\text{COOH}) - 2\text{H}]^+$  (d) and  $[\text{Ho}(\text{acac})_3 - 2\text{H}]^+$  (e).

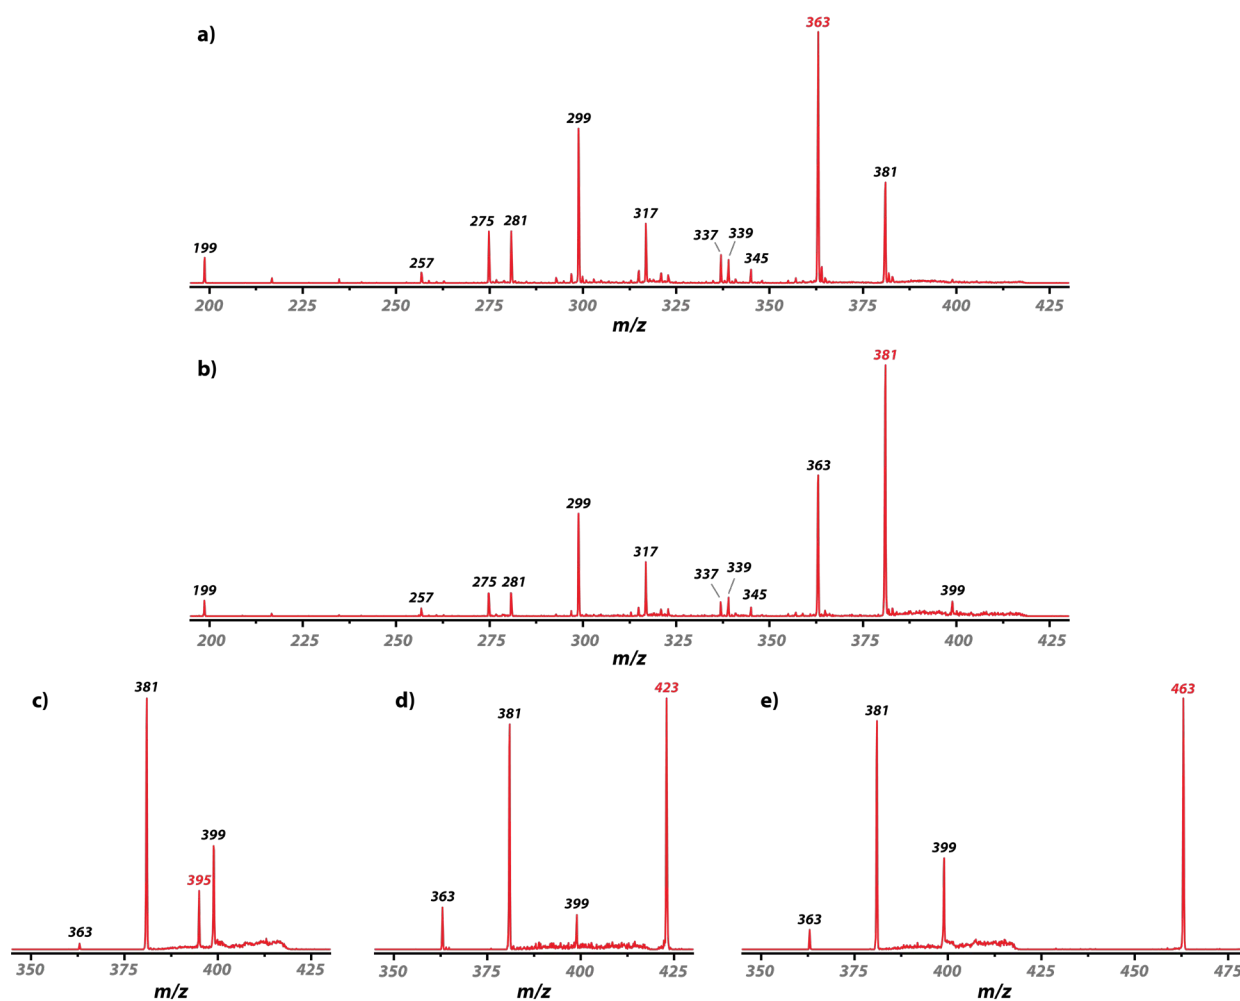

**Figure S3.** IRMPD fragmentation mass spectra for each of the complexes under investigation:  $[\text{Ho}(\text{acac})_2 - 2\text{H}]^+$  (a),  $[\text{Ho}(\text{acac})_2(\text{H}_2\text{O}) - 2\text{H}]^+$  (b),  $[\text{Ho}(\text{acac})_2(\text{MeOH}) - 2\text{H}]^+$  (c),  $[\text{Ho}(\text{acac})_2(\text{CH}_3\text{COOH}) - 2\text{H}]^+$  (d) and  $[\text{Ho}(\text{acac})_3 - 2\text{H}]^+$  (e). The precursor mass for each of the fragmentation spectra is indicated in red. The spectra were reconstructed from the strongest absorption bands for each complex.

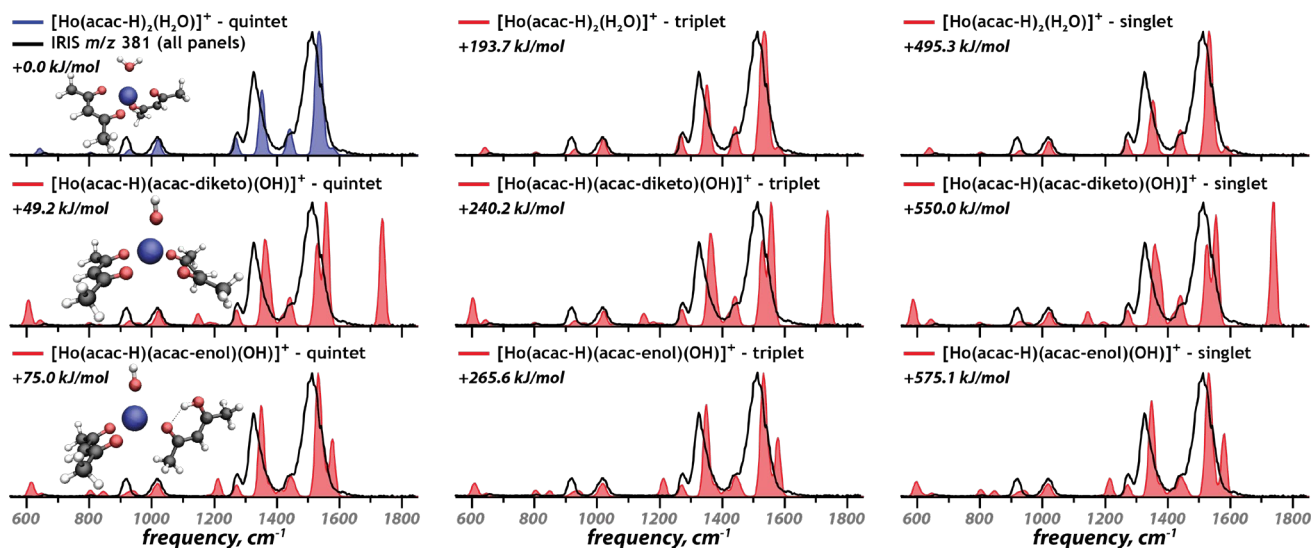

**Figure S4.** Comparison of the calculated spectra (coloured) of the three spin states of each considered geometry for the  $[\text{Ho}(\text{acac})_2\text{H}_2\text{O} - 2\text{H}]^+$  complex to experimental spectrum of the  $m/z$  381 ion (black). Incribed are the relative energies of the computed structures. The displayed geometries represent the geometries of each row.

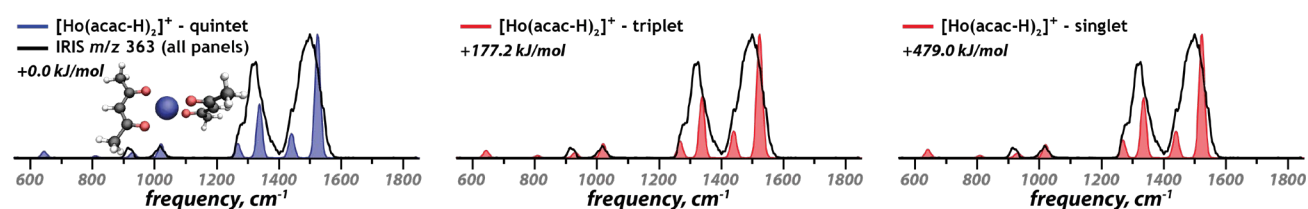

**Figure S5.** Comparison of the calculated spectra (coloured) of the three spin states of the  $[\text{Ho}(\text{acac} - \text{H})_2]^+$  complex to experimental spectrum of the  $m/z$  363 ion (black). Incribed are the relative energies of the computed structures. The displayed geometry represents the geometries of the entire row.

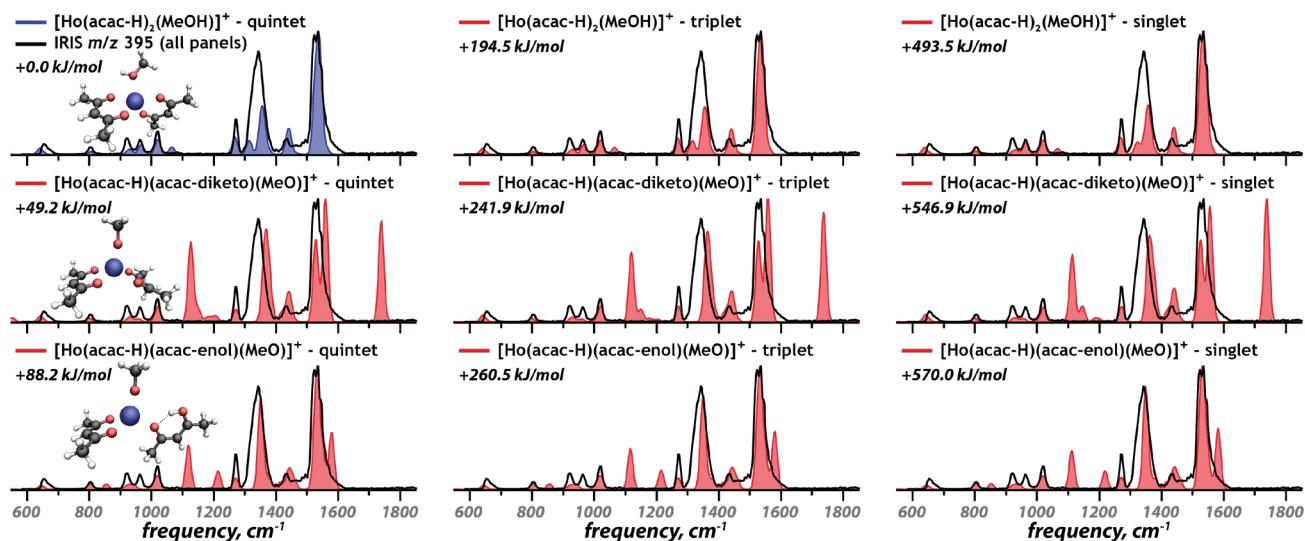

**Figure S6.** Comparison of the calculated spectra (coloured) of the three spin states of each considered geometry for the  $[\text{Ho}(\text{acac})_2(\text{MeOH}) - 2\text{H}]^+$  complex to experimental spectrum of the  $m/z$  395 ion (black). Inscribed are the relative energies of the computed structures. The displayed geometries represent the geometries of each row.

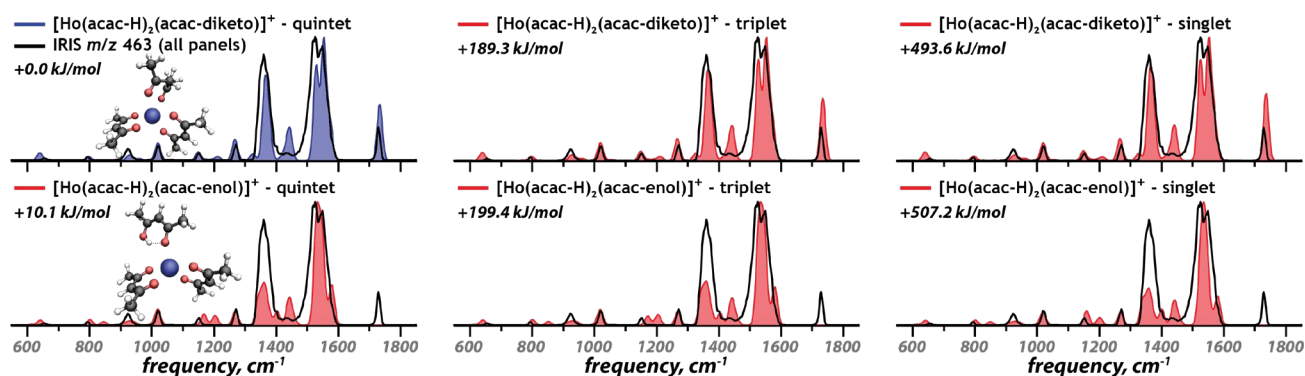

**Figure S7.** Comparison of the calculated spectra (coloured) of the three spin states of each considered geometry for the  $[\text{Ho}(\text{acac})_3 - 2\text{H}]^+$  complex to experimental spectrum of the  $m/z$  463 ion (black). Inscribed are the relative energies of the computed structures. The displayed geometries represent the geometries of each row.

**Table S1.** Calculated harmonic frequencies, scaled frequencies (0.975) and corresponding intensities of the vibrational analysis on the assigned ionic complexes presented in Figure 2.

| [Ho(acac-H)] <sup>+</sup>                 |                                            |                                      | [Ho(acac-H) <sub>2</sub> (H <sub>2</sub> O)] <sup>+</sup> |                                            |                                      | [Ho(acac-H) <sub>2</sub> (MeOH)] <sup>+</sup> |                                            |                                      | [Ho(acac-H) <sub>2</sub> (acac)] <sup>+</sup> |                                            |                                      |
|-------------------------------------------|--------------------------------------------|--------------------------------------|-----------------------------------------------------------|--------------------------------------------|--------------------------------------|-----------------------------------------------|--------------------------------------------|--------------------------------------|-----------------------------------------------|--------------------------------------------|--------------------------------------|
| V <sub>harm.</sub><br>(cm <sup>-1</sup> ) | V <sub>scaled</sub><br>(cm <sup>-1</sup> ) | Intensity<br>(km-mol <sup>-1</sup> ) | V <sub>harm.</sub><br>(cm <sup>-1</sup> )                 | V <sub>scaled</sub><br>(cm <sup>-1</sup> ) | Intensity<br>(km-mol <sup>-1</sup> ) | V <sub>harm.</sub><br>(cm <sup>-1</sup> )     | V <sub>scaled</sub><br>(cm <sup>-1</sup> ) | Intensity<br>(km-mol <sup>-1</sup> ) | V <sub>harm.</sub><br>(cm <sup>-1</sup> )     | V <sub>scaled</sub><br>(cm <sup>-1</sup> ) | Intensity<br>(km-mol <sup>-1</sup> ) |
| 24.0                                      | 23.4                                       | 0.2                                  | 16.5                                                      | 16.1                                       | 3.2                                  | 19.6                                          | 19.1                                       | 0.5                                  | 21.2                                          | 20.7                                       | 0.2                                  |
| 25.3                                      | 24.7                                       | 0.3                                  | 25.2                                                      | 24.6                                       | 2.0                                  | 27.6                                          | 26.9                                       | 0.8                                  | 24.8                                          | 24.2                                       | 1.3                                  |
| 36.0                                      | 35.1                                       | 0.0                                  | 28.9                                                      | 28.2                                       | 0.8                                  | 28.8                                          | 28.0                                       | 1.0                                  | 28.0                                          | 27.3                                       | 0.5                                  |
| 86.5                                      | 84.4                                       | 0.0                                  | 31.8                                                      | 31.0                                       | 0.2                                  | 32.2                                          | 31.4                                       | 0.3                                  | 29.1                                          | 28.4                                       | 1.6                                  |
| 86.6                                      | 84.4                                       | 0.0                                  | 67.8                                                      | 66.1                                       | 5.2                                  | 53.3                                          | 51.9                                       | 1.4                                  | 31.7                                          | 30.9                                       | 0.1                                  |
| 98.4                                      | 95.9                                       | 0.0                                  | 79.1                                                      | 77.1                                       | 0.5                                  | 79.3                                          | 77.3                                       | 0.4                                  | 35.8                                          | 34.9                                       | 3.4                                  |
| 98.6                                      | 96.1                                       | 0.0                                  | 79.6                                                      | 77.6                                       | 0.6                                  | 80.2                                          | 78.2                                       | 0.7                                  | 76.3                                          | 74.4                                       | 2.0                                  |
| 115.8                                     | 112.9                                      | 21.3                                 | 97.6                                                      | 95.1                                       | 0.0                                  | 94.4                                          | 92.0                                       | 0.8                                  | 83.9                                          | 81.8                                       | 0.4                                  |
| 117.6                                     | 114.7                                      | 21.7                                 | 98.0                                                      | 95.6                                       | 0.0                                  | 97.4                                          | 95.0                                       | 0.0                                  | 86.5                                          | 84.3                                       | 0.9                                  |
| 119.5                                     | 116.5                                      | 0.0                                  | 112.6                                                     | 109.8                                      | 7.2                                  | 98.5                                          | 96.1                                       | 0.1                                  | 92.8                                          | 90.5                                       | 1.5                                  |
| 149.8                                     | 146.1                                      | 0.0                                  | 118.5                                                     | 115.6                                      | 0.3                                  | 112.7                                         | 109.9                                      | 2.9                                  | 97.7                                          | 95.3                                       | 0.1                                  |
| 165.2                                     | 161.1                                      | 0.3                                  | 120.7                                                     | 117.7                                      | 18.3                                 | 119.4                                         | 116.4                                      | 5.2                                  | 99.1                                          | 96.6                                       | 0.0                                  |
| 165.3                                     | 161.1                                      | 0.3                                  | 146.3                                                     | 142.7                                      | 6.3                                  | 123.7                                         | 120.6                                      | 9.1                                  | 113.3                                         | 110.5                                      | 4.7                                  |
| 174.5                                     | 170.2                                      | 0.0                                  | 163.5                                                     | 159.4                                      | 0.0                                  | 131.2                                         | 127.9                                      | 12.8                                 | 120.2                                         | 117.2                                      | 4.3                                  |
| 223.1                                     | 217.5                                      | 6.6                                  | 164.4                                                     | 160.3                                      | 1.2                                  | 143.8                                         | 140.3                                      | 8.0                                  | 128.9                                         | 125.7                                      | 5.2                                  |
| 250.9                                     | 244.7                                      | 0.0                                  | 186.2                                                     | 181.5                                      | 0.3                                  | 163.1                                         | 159.0                                      | 0.1                                  | 133.4                                         | 130.1                                      | 1.8                                  |
| 257.5                                     | 251.0                                      | 6.0                                  | 230.5                                                     | 224.8                                      | 4.0                                  | 164.3                                         | 160.1                                      | 1.5                                  | 138.0                                         | 134.5                                      | 2.1                                  |
| 258.4                                     | 251.9                                      | 5.8                                  | 231.9                                                     | 226.1                                      | 3.7                                  | 185.0                                         | 180.4                                      | 0.9                                  | 144.8                                         | 141.1                                      | 2.1                                  |
| 262.3                                     | 255.8                                      | 43.0                                 | 235.4                                                     | 229.5                                      | 13.1                                 | 191.7                                         | 186.9                                      | 0.3                                  | 153.4                                         | 149.5                                      | 4.9                                  |
| 403.4                                     | 393.4                                      | 17.1                                 | 249.7                                                     | 243.4                                      | 0.4                                  | 228.1                                         | 222.4                                      | 9.2                                  | 161.3                                         | 157.3                                      | 2.8                                  |
| 404.2                                     | 394.1                                      | 17.0                                 | 254.4                                                     | 248.0                                      | 27.9                                 | 233.9                                         | 228.1                                      | 2.0                                  | 163.7                                         | 159.6                                      | 1.0                                  |
| 443.8                                     | 432.7                                      | 167.6                                | 306.2                                                     | 298.6                                      | 9.8                                  | 236.0                                         | 230.1                                      | 11.8                                 | 165.9                                         | 161.7                                      | 1.1                                  |
| 452.1                                     | 440.8                                      | 0.2                                  | 339.4                                                     | 330.9                                      | 0.2                                  | 249.4                                         | 243.1                                      | 0.5                                  | 175.1                                         | 170.7                                      | 19.5                                 |
| 549.7                                     | 536.0                                      | 14.1                                 | 344.8                                                     | 336.2                                      | 233.4                                | 255.0                                         | 248.6                                      | 40.6                                 | 191.0                                         | 186.2                                      | 2.1                                  |
| 550.5                                     | 536.7                                      | 14.1                                 | 405.4                                                     | 395.3                                      | 12.2                                 | 307.0                                         | 299.3                                      | 17.0                                 | 221.8                                         | 216.2                                      | 12.1                                 |
| 567.9                                     | 553.7                                      | 0.0                                  | 406.3                                                     | 396.1                                      | 30.7                                 | 406.8                                         | 396.6                                      | 15.7                                 | 222.8                                         | 217.2                                      | 24.9                                 |
| 568.2                                     | 554.0                                      | 0.0                                  | 429.0                                                     | 418.2                                      | 89.0                                 | 407.8                                         | 397.6                                      | 13.2                                 | 236.6                                         | 230.7                                      | 14.3                                 |
| 660.0                                     | 643.5                                      | 111.7                                | 442.7                                                     | 431.6                                      | 1.2                                  | 430.6                                         | 419.9                                      | 124.9                                | 239.9                                         | 233.9                                      | 0.4                                  |
| 668.8                                     | 652.1                                      | 0.0                                  | 481.7                                                     | 469.6                                      | 131.7                                | 441.1                                         | 430.0                                      | 3.5                                  | 245.3                                         | 239.2                                      | 35.0                                 |
| 669.2                                     | 652.5                                      | 3.2                                  | 542.2                                                     | 528.6                                      | 20.4                                 | 485.1                                         | 472.9                                      | 113.5                                | 246.6                                         | 240.5                                      | 14.2                                 |
| 669.3                                     | 652.6                                      | 3.1                                  | 542.8                                                     | 529.2                                      | 11.3                                 | 540.9                                         | 527.4                                      | 21.0                                 | 356.9                                         | 348.0                                      | 2.7                                  |
| 830.2                                     | 809.4                                      | 16.0                                 | 568.0                                                     | 553.8                                      | 0.1                                  | 542.0                                         | 528.4                                      | 10.7                                 | 362.2                                         | 353.1                                      | 23.5                                 |
| 830.9                                     | 810.2                                      | 15.8                                 | 568.2                                                     | 554.0                                      | 0.0                                  | 567.9                                         | 553.7                                      | 0.0                                  | 406.7                                         | 396.6                                      | 18.9                                 |
| 952.3                                     | 928.5                                      | 29.4                                 | 657.2                                                     | 640.7                                      | 85.2                                 | 568.4                                         | 554.2                                      | 0.1                                  | 409.1                                         | 398.9                                      | 12.1                                 |
| 952.5                                     | 928.7                                      | 29.2                                 | 664.1                                                     | 647.5                                      | 2.4                                  | 656.8                                         | 640.4                                      | 75.6                                 | 421.2                                         | 410.6                                      | 88.3                                 |
| 954.3                                     | 930.5                                      | 29.9                                 | 670.3                                                     | 653.5                                      | 6.0                                  | 663.4                                         | 646.8                                      | 3.9                                  | 433.8                                         | 423.0                                      | 19.9                                 |
| 955.0                                     | 931.1                                      | 11.2                                 | 670.7                                                     | 654.0                                      | 3.2                                  | 670.3                                         | 653.6                                      | 3.7                                  | 491.8                                         | 479.5                                      | 2.7                                  |
| 1038.4                                    | 1012.4                                     | 4.7                                  | 825.4                                                     | 804.8                                      | 14.0                                 | 671.5                                         | 654.7                                      | 5.1                                  | 511.2                                         | 498.4                                      | 0.8                                  |
| 1038.5                                    | 1012.5                                     | 4.6                                  | 825.7                                                     | 805.0                                      | 20.1                                 | 824.8                                         | 804.2                                      | 15.7                                 | 533.7                                         | 520.3                                      | 12.6                                 |
| 1044.3                                    | 1018.2                                     | 18.3                                 | 951.1                                                     | 927.3                                      | 31.9                                 | 825.3                                         | 804.7                                      | 18.5                                 | 535.6                                         | 522.2                                      | 44.1                                 |
| 1044.4                                    | 1018.3                                     | 18.1                                 | 951.7                                                     | 927.9                                      | 15.4                                 | 950.8                                         | 927.0                                      | 31.6                                 | 536.7                                         | 523.3                                      | 11.3                                 |
| 1047.2                                    | 1021.0                                     | 213.2                                | 957.8                                                     | 933.8                                      | 31.3                                 | 951.9                                         | 928.1                                      | 15.1                                 | 569.1                                         | 554.9                                      | 0.0                                  |
| 1051.2                                    | 1024.9                                     | 0.1                                  | 958.2                                                     | 934.2                                      | 0.5                                  | 958.3                                         | 934.3                                      | 22.2                                 | 569.3                                         | 555.1                                      | 0.1                                  |
| 1057.5                                    | 1031.0                                     | 0.0                                  | 1037.5                                                    | 1011.6                                     | 4.6                                  | 958.7                                         | 934.7                                      | 8.1                                  | 654.4                                         | 638.0                                      | 13.2                                 |
| 1057.6                                    | 1031.1                                     | 0.0                                  | 1037.7                                                    | 1011.7                                     | 5.8                                  | 992.0                                         | 967.2                                      | 132.0                                | 654.6                                         | 638.3                                      | 49.5                                 |
| 1222.1                                    | 1191.5                                     | 0.3                                  | 1044.6                                                    | 1018.5                                     | 13.1                                 | 1037.3                                        | 1011.4                                     | 6.3                                  | 660.5                                         | 644.0                                      | 9.4                                  |
| 1222.1                                    | 1191.6                                     | 0.3                                  | 1044.8                                                    | 1018.6                                     | 18.6                                 | 1037.4                                        | 1011.4                                     | 6.6                                  | 672.0                                         | 655.2                                      | 4.1                                  |
| 1299.9                                    | 1267.4                                     | 260.4                                | 1046.7                                                    | 1020.5                                     | 165.8                                | 1044.4                                        | 1018.3                                     | 15.1                                 | 672.5                                         | 655.7                                      | 4.5                                  |
| 1306.0                                    | 1273.3                                     | 0.2                                  | 1050.0                                                    | 1023.7                                     | 8.1                                  | 1044.9                                        | 1018.7                                     | 16.3                                 | 786.9                                         | 767.2                                      | 5.1                                  |
| 1371.2                                    | 1336.9                                     | 499.1                                | 1058.1                                                    | 1031.7                                     | 0.1                                  | 1046.7                                        | 1020.5                                     | 157.5                                | 817.4                                         | 797.0                                      | 17.0                                 |
| 1371.8                                    | 1337.5                                     | 500.2                                | 1058.2                                                    | 1031.8                                     | 0.2                                  | 1050.1                                        | 1023.8                                     | 7.6                                  | 818.2                                         | 797.8                                      | 19.0                                 |
| 1403.7                                    | 1368.6                                     | 0.4                                  | 1223.8                                                    | 1193.2                                     | 4.4                                  | 1058.1                                        | 1031.6                                     | 0.1                                  | 849.9                                         | 828.6                                      | 4.3                                  |
| 1403.8                                    | 1368.7                                     | 0.4                                  | 1223.9                                                    | 1193.3                                     | 0.8                                  | 1058.3                                        | 1031.9                                     | 0.1                                  | 888.9                                         | 866.6                                      | 3.5                                  |
| 1407.1                                    | 1371.9                                     | 0.0                                  | 1299.7                                                    | 1267.2                                     | 241.0                                | 1092.7                                        | 1065.4                                     | 99.1                                 | 948.5                                         | 924.7                                      | 25.0                                 |
| 1407.1                                    | 1371.9                                     | 0.0                                  | 1305.4                                                    | 1272.8                                     | 3.4                                  | 1174.7                                        | 1145.4                                     | 1.1                                  | 950.4                                         | 926.7                                      | 14.3                                 |
| 1469.0                                    | 1432.3                                     | 0.1                                  | 1384.6                                                    | 1350.0                                     | 309.4                                | 1223.6                                        | 1193.0                                     | 2.9                                  | 959.2                                         | 935.2                                      | 10.4                                 |
| 1469.2                                    | 1432.5                                     | 0.3                                  | 1388.6                                                    | 1353.9                                     | 612.0                                | 1224.6                                        | 1194.0                                     | 2.2                                  | 960.0                                         | 936.0                                      | 6.0                                  |
| 1469.9                                    | 1433.1                                     | 22.7                                 | 1404.7                                                    | 1369.6                                     | 0.0                                  | 1300.2                                        | 1267.7                                     | 229.5                                | 966.2                                         | 942.1                                      | 9.7                                  |
| 1470.0                                    | 1433.2                                     | 22.5                                 | 1404.8                                                    | 1369.7                                     | 0.1                                  | 1305.7                                        | 1273.1                                     | 7.3                                  | 986.2                                         | 961.5                                      | 15.7                                 |
| 1477.9                                    | 1441.0                                     | 412.6                                | 1407.9                                                    | 1372.7                                     | 4.5                                  | 1348.2                                        | 1314.5                                     | 185.9                                | 1030.8                                        | 1005.0                                     | 3.3                                  |
| 1480.2                                    | 1443.2                                     | 0.1                                  | 1408.7                                                    | 1373.5                                     | 23.1                                 | 1385.7                                        | 1351.0                                     | 348.7                                | 1036.1                                        | 1010.2                                     | 7.4                                  |
| 1483.5                                    | 1446.4                                     | 1.5                                  | 1470.7                                                    | 1434.0                                     | 3.7                                  | 1394.7                                        | 1359.8                                     | 400.0                                | 1036.7                                        | 1010.8                                     | 4.6                                  |
| 1483.6                                    | 1446.5                                     | 1.4                                  | 1470.8                                                    | 1434.0                                     | 8.4                                  | 1404.7                                        | 1369.6                                     | 0.0                                  | 1044.4                                        | 1018.3                                     | 11.2                                 |
| 1561.7                                    | 1522.7                                     | 1354.5                               | 1472.4                                                    | 1435.6                                     | 14.9                                 | 1405.0                                        | 1369.9                                     | 0.1                                  | 1045.1                                        | 1019.0                                     | 18.0                                 |
| 1566.7                                    | 1527.6                                     | 518.6                                | 1472.6                                                    | 1435.7                                     | 15.2                                 | 1407.9                                        | 1372.7                                     | 5.0                                  | 1045.9                                        | 1019.8                                     | 101.0                                |
| 1566.9                                    | 1527.7                                     | 520.2                                | 1478.8                                                    | 1441.8                                     | 307.9                                | 1410.3                                        | 1375.0                                     | 56.0                                 | 1048.8                                        | 1022.6                                     | 29.6                                 |

|        |        |      |        |        |        |        |        |        |        |        |        |
|--------|--------|------|--------|--------|--------|--------|--------|--------|--------|--------|--------|
| 1586.6 | 1547.0 | 1.4  | 1480.6 | 1443.6 | 21.0   | 1470.9 | 1434.1 | 3.8    | 1058.2 | 1031.8 | 0.3    |
| 3052.0 | 2975.7 | 1.6  | 1485.7 | 1448.5 | 1.1    | 1471.0 | 1434.2 | 8.4    | 1059.1 | 1032.6 | 0.1    |
| 3052.1 | 2975.8 | 0.2  | 1485.7 | 1448.6 | 1.7    | 1472.3 | 1435.5 | 16.4   | 1081.4 | 1054.4 | 8.3    |
| 3052.1 | 2975.8 | 0.2  | 1565.7 | 1526.5 | 688.0  | 1473.3 | 1436.5 | 15.5   | 1178.8 | 1149.3 | 81.3   |
| 3052.1 | 2975.8 | 0.3  | 1567.4 | 1528.2 | 386.8  | 1478.8 | 1441.8 | 282.6  | 1204.4 | 1174.3 | 9.3    |
| 3111.2 | 3033.4 | 0.0  | 1580.1 | 1540.6 | 1271.3 | 1480.4 | 1443.4 | 24.6   | 1224.5 | 1193.9 | 5.6    |
| 3111.2 | 3033.4 | 0.0  | 1600.2 | 1560.2 | 85.4   | 1481.1 | 1444.0 | 12.0   | 1225.9 | 1195.2 | 4.2    |
| 3111.2 | 3033.4 | 0.8  | 1620.9 | 1580.4 | 89.5   | 1486.1 | 1448.9 | 1.3    | 1243.7 | 1212.6 | 35.4   |
| 3111.2 | 3033.5 | 0.7  | 3052.0 | 2975.7 | 0.5    | 1486.8 | 1449.7 | 0.7    | 1298.7 | 1266.2 | 158.3  |
| 3167.0 | 3087.8 | 23.9 | 3052.1 | 2975.8 | 0.6    | 1501.2 | 1463.7 | 8.6    | 1303.6 | 1271.0 | 48.7   |
| 3167.1 | 3088.0 | 6.6  | 3052.1 | 2975.8 | 0.3    | 1508.1 | 1470.4 | 6.8    | 1358.5 | 1324.6 | 62.7   |
| 3167.2 | 3088.0 | 1.0  | 3052.2 | 2975.9 | 0.2    | 1566.6 | 1527.4 | 611.6  | 1397.0 | 1362.0 | 262.1  |
| 3167.3 | 3088.2 | 1.0  | 3111.6 | 3033.8 | 1.3    | 1568.4 | 1529.2 | 388.9  | 1398.3 | 1363.4 | 161.2  |
| 3235.9 | 3155.0 | 0.1  | 3111.6 | 3033.8 | 1.3    | 1581.1 | 1541.6 | 1274.7 | 1400.5 | 1365.5 | 156.2  |
| 3235.9 | 3155.0 | 0.0  | 3111.8 | 3034.0 | 1.4    | 1602.6 | 1562.6 | 78.3   | 1401.7 | 1366.7 | 129.3  |
|        |        |      | 3111.8 | 3034.0 | 1.3    | 3051.5 | 2975.2 | 0.9    | 1404.6 | 1369.5 | 0.4    |
|        |        |      | 3163.2 | 3084.1 | 22.7   | 3052.1 | 2975.8 | 0.4    | 1404.7 | 1369.6 | 1.2    |
|        |        |      | 3163.2 | 3084.1 | 1.7    | 3052.1 | 2975.8 | 0.4    | 1409.4 | 1374.1 | 47.8   |
|        |        |      | 3163.8 | 3084.7 | 8.8    | 3052.2 | 2975.9 | 0.2    | 1412.7 | 1377.4 | 287.5  |
|        |        |      | 3163.8 | 3084.7 | 3.1    | 3074.6 | 2997.7 | 25.6   | 1441.7 | 1405.7 | 8.0    |
|        |        |      | 3234.2 | 3153.4 | 0.7    | 3111.1 | 3033.4 | 1.9    | 1457.1 | 1420.7 | 0.3    |
|        |        |      | 3234.3 | 3153.4 | 0.4    | 3111.6 | 3033.8 | 1.4    | 1459.0 | 1422.5 | 43.0   |
|        |        |      | 3783.2 | 3688.6 | 97.6   | 3111.8 | 3034.0 | 1.5    | 1467.2 | 1430.5 | 5.1    |
|        |        |      | 3887.0 | 3789.8 | 165.3  | 3112.0 | 3034.2 | 1.2    | 1467.8 | 1431.1 | 23.2   |
|        |        |      |        |        |        | 3162.5 | 3083.4 | 13.0   | 1472.5 | 1435.7 | 7.2    |
|        |        |      |        |        |        | 3162.9 | 3083.8 | 11.6   | 1472.9 | 1436.0 | 1.5    |
|        |        |      |        |        |        | 3163.1 | 3084.1 | 8.0    | 1473.6 | 1436.8 | 18.3   |
|        |        |      |        |        |        | 3163.3 | 3084.2 | 7.2    | 1476.0 | 1439.1 | 13.9   |
|        |        |      |        |        |        | 3163.3 | 3084.3 | 3.7    | 1480.2 | 1443.2 | 217.1  |
|        |        |      |        |        |        | 3192.3 | 3112.5 | 2.1    | 1481.5 | 1444.5 | 52.5   |
|        |        |      |        |        |        | 3233.8 | 3152.9 | 0.8    | 1488.6 | 1451.3 | 2.2    |
|        |        |      |        |        |        | 3233.8 | 3153.0 | 0.5    | 1489.7 | 1452.4 | 5.7    |
|        |        |      |        |        |        | 3791.1 | 3696.3 | 101.9  | 1567.4 | 1528.2 | 247.1  |
|        |        |      |        |        |        |        |        |        | 1568.0 | 1528.8 | 651.0  |
|        |        |      |        |        |        |        |        |        | 1593.2 | 1553.4 | 1144.9 |
|        |        |      |        |        |        |        |        |        | 1614.1 | 1573.8 | 357.3  |
|        |        |      |        |        |        |        |        |        | 1712.8 | 1670.0 | 1.1    |
|        |        |      |        |        |        |        |        |        | 1777.7 | 1733.3 | 536.3  |
|        |        |      |        |        |        |        |        |        | 3009.8 | 2934.6 | 30.5   |
|        |        |      |        |        |        |        |        |        | 3042.0 | 2965.9 | 5.7    |
|        |        |      |        |        |        |        |        |        | 3042.5 | 2966.4 | 2.9    |
|        |        |      |        |        |        |        |        |        | 3048.3 | 2972.1 | 5.1    |
|        |        |      |        |        |        |        |        |        | 3051.6 | 2975.3 | 1.8    |
|        |        |      |        |        |        |        |        |        | 3051.7 | 2975.4 | 1.3    |
|        |        |      |        |        |        |        |        |        | 3052.3 | 2975.9 | 0.8    |
|        |        |      |        |        |        |        |        |        | 3099.9 | 3022.4 | 0.0    |
|        |        |      |        |        |        |        |        |        | 3100.5 | 3022.9 | 0.0    |
|        |        |      |        |        |        |        |        |        | 3107.8 | 3030.1 | 5.3    |
|        |        |      |        |        |        |        |        |        | 3112.1 | 3034.3 | 0.1    |
|        |        |      |        |        |        |        |        |        | 3112.2 | 3034.4 | 5.0    |
|        |        |      |        |        |        |        |        |        | 3112.9 | 3035.1 | 1.9    |
|        |        |      |        |        |        |        |        |        | 3141.4 | 3062.9 | 2.1    |
|        |        |      |        |        |        |        |        |        | 3157.1 | 3078.2 | 12.9   |
|        |        |      |        |        |        |        |        |        | 3158.0 | 3079.0 | 18.6   |
|        |        |      |        |        |        |        |        |        | 3158.3 | 3079.3 | 5.5    |
|        |        |      |        |        |        |        |        |        | 3158.9 | 3079.9 | 9.5    |
|        |        |      |        |        |        |        |        |        | 3177.6 | 3098.1 | 2.0    |
|        |        |      |        |        |        |        |        |        | 3177.7 | 3098.3 | 1.1    |
|        |        |      |        |        |        |        |        |        | 3230.1 | 3149.3 | 2.2    |
|        |        |      |        |        |        |        |        |        | 3230.4 | 3149.7 | 2.1    |

**Table S2.** Calculated harmonic frequencies, scaled frequencies (0.975) and corresponding intensities of the vibrational analysis on the ionic complexes presented in Figure 4.

| [Ho(acac-H) <sub>2</sub> (CH <sub>2</sub> COOH-bonded)] <sup>+</sup> |                                            |                                      | [Ho(acac-H) <sub>2</sub> (CH <sub>2</sub> COOH-cis)] <sup>+</sup> |                                            |                                      | [Ho(acac-H)(acac-diketo)(CH <sub>2</sub> COO)] <sup>+</sup> |                                            |                                      | [Ho(acac-H) <sub>2</sub> (CH <sub>2</sub> COOH-trans)] <sup>+</sup> |                                            |                                      | [Ho(acac-H)(acac-enol)(CH <sub>2</sub> COO)] <sup>+</sup> |                                            |                                      |
|----------------------------------------------------------------------|--------------------------------------------|--------------------------------------|-------------------------------------------------------------------|--------------------------------------------|--------------------------------------|-------------------------------------------------------------|--------------------------------------------|--------------------------------------|---------------------------------------------------------------------|--------------------------------------------|--------------------------------------|-----------------------------------------------------------|--------------------------------------------|--------------------------------------|
| V <sub>harm.</sub><br>(cm <sup>-1</sup> )                            | V <sub>scaled</sub><br>(cm <sup>-1</sup> ) | Intensity<br>(km-mol <sup>-1</sup> ) | V <sub>harm.</sub><br>(cm <sup>-1</sup> )                         | V <sub>scaled</sub><br>(cm <sup>-1</sup> ) | Intensity<br>(km-mol <sup>-1</sup> ) | V <sub>harm.</sub><br>(cm <sup>-1</sup> )                   | V <sub>scaled</sub><br>(cm <sup>-1</sup> ) | Intensity<br>(km-mol <sup>-1</sup> ) | V <sub>harm.</sub><br>(cm <sup>-1</sup> )                           | V <sub>scaled</sub><br>(cm <sup>-1</sup> ) | Intensity<br>(km-mol <sup>-1</sup> ) | V <sub>harm.</sub><br>(cm <sup>-1</sup> )                 | V <sub>scaled</sub><br>(cm <sup>-1</sup> ) | Intensity<br>(km-mol <sup>-1</sup> ) |
| 23.1                                                                 | 22.5                                       | 0.1                                  | 14.8                                                              | 14.4                                       | 1.7                                  | 21.3                                                        | 20.8                                       | 0.0                                  | 18.7                                                                | 18.3                                       | 0.4                                  | 8.3                                                       | 8.1                                        | 0.2                                  |
| 25.6                                                                 | 24.9                                       | 0.4                                  | 18.7                                                              | 18.2                                       | 2.9                                  | 25.4                                                        | 24.8                                       | 2.2                                  | 20.5                                                                | 19.9                                       | 0.6                                  | 13.4                                                      | 13.1                                       | 0.4                                  |
| 27.9                                                                 | 27.2                                       | 0.5                                  | 22.9                                                              | 22.3                                       | 0.5                                  | 32.9                                                        | 32.1                                       | 1.1                                  | 23.9                                                                | 23.3                                       | 0.9                                  | 23.7                                                      | 23.1                                       | 1.4                                  |
| 31.0                                                                 | 30.2                                       | 0.3                                  | 26.7                                                              | 26.0                                       | 2.7                                  | 34.9                                                        | 34.1                                       | 0.1                                  | 26.0                                                                | 25.4                                       | 0.1                                  | 24.8                                                      | 24.1                                       | 0.4                                  |
| 34.1                                                                 | 33.3                                       | 0.5                                  | 28.3                                                              | 27.6                                       | 0.5                                  | 42.8                                                        | 41.8                                       | 0.7                                  | 28.2                                                                | 27.5                                       | 0.4                                  | 33.2                                                      | 32.3                                       | 0.5                                  |
| 64.8                                                                 | 63.1                                       | 1.2                                  | 29.7                                                              | 28.9                                       | 1.1                                  | 49.4                                                        | 48.2                                       | 2.0                                  | 30.9                                                                | 30.2                                       | 0.2                                  | 33.8                                                      | 33.0                                       | 0.1                                  |
| 84.1                                                                 | 82.0                                       | 1.2                                  | 39.8                                                              | 38.8                                       | 0.1                                  | 65.2                                                        | 63.5                                       | 1.0                                  | 80.5                                                                | 78.4                                       | 0.1                                  | 48.2                                                      | 47.0                                       | 1.5                                  |
| 84.7                                                                 | 82.6                                       | 0.8                                  | 57.8                                                              | 56.3                                       | 1.6                                  | 86.9                                                        | 84.7                                       | 0.3                                  | 81.1                                                                | 79.1                                       | 0.1                                  | 68.6                                                      | 66.9                                       | 0.2                                  |
| 89.2                                                                 | 87.0                                       | 0.3                                  | 83.7                                                              | 81.6                                       | 0.3                                  | 88.9                                                        | 86.7                                       | 1.7                                  | 83.3                                                                | 81.3                                       | 2.9                                  | 76.9                                                      | 74.9                                       | 1.3                                  |
| 101.0                                                                | 98.5                                       | 0.0                                  | 84.6                                                              | 82.5                                       | 0.8                                  | 96.9                                                        | 94.5                                       | 3.0                                  | 94.2                                                                | 91.8                                       | 1.4                                  | 83.5                                                      | 81.4                                       | 2.9                                  |
| 102.9                                                                | 100.3                                      | 0.6                                  | 98.9                                                              | 96.4                                       | 0.2                                  | 99.4                                                        | 96.9                                       | 0.0                                  | 97.0                                                                | 94.5                                       | 0.1                                  | 86.4                                                      | 84.3                                       | 0.5                                  |
| 106.5                                                                | 103.9                                      | 1.8                                  | 99.4                                                              | 96.9                                       | 0.1                                  | 117.1                                                       | 114.2                                      | 5.4                                  | 99.5                                                                | 97.0                                       | 0.2                                  | 87.1                                                      | 84.9                                       | 0.4                                  |
| 125.9                                                                | 122.7                                      | 6.3                                  | 109.7                                                             | 106.9                                      | 7.4                                  | 124.9                                                       | 121.7                                      | 4.6                                  | 101.7                                                               | 99.2                                       | 1.0                                  | 98.7                                                      | 96.2                                       | 0.0                                  |
| 131.0                                                                | 127.7                                      | 4.7                                  | 121.5                                                             | 118.4                                      | 2.6                                  | 131.3                                                       | 128.0                                      | 6.2                                  | 123.7                                                               | 120.6                                      | 4.7                                  | 111.9                                                     | 109.1                                      | 5.1                                  |
| 147.8                                                                | 144.1                                      | 6.6                                  | 124.6                                                             | 121.5                                      | 7.2                                  | 134.1                                                       | 130.8                                      | 4.6                                  | 127.4                                                               | 124.2                                      | 5.5                                  | 123.2                                                     | 120.1                                      | 8.5                                  |
| 159.2                                                                | 155.2                                      | 5.3                                  | 142.3                                                             | 138.7                                      | 8.4                                  | 142.9                                                       | 139.4                                      | 5.1                                  | 139.8                                                               | 136.3                                      | 3.5                                  | 134.8                                                     | 131.4                                      | 2.7                                  |
| 164.7                                                                | 160.6                                      | 0.4                                  | 143.7                                                             | 140.1                                      | 9.8                                  | 151.1                                                       | 147.3                                      | 2.8                                  | 145.5                                                               | 141.9                                      | 10.7                                 | 151.7                                                     | 147.9                                      | 0.3                                  |
| 171.0                                                                | 166.7                                      | 5.9                                  | 163.2                                                             | 159.1                                      | 0.5                                  | 164.4                                                       | 160.3                                      | 0.4                                  | 163.0                                                               | 158.9                                      | 0.2                                  | 162.3                                                     | 158.3                                      | 1.4                                  |
| 176.9                                                                | 172.5                                      | 14.4                                 | 163.8                                                             | 159.7                                      | 1.2                                  | 176.3                                                       | 171.9                                      | 1.3                                  | 164.0                                                               | 159.9                                      | 1.6                                  | 170.0                                                     | 165.8                                      | 13.8                                 |
| 186.1                                                                | 181.5                                      | 2.3                                  | 188.7                                                             | 183.9                                      | 6.5                                  | 187.4                                                       | 182.8                                      | 20.5                                 | 192.3                                                               | 187.5                                      | 3.8                                  | 188.2                                                     | 183.5                                      | 1.3                                  |
| 209.4                                                                | 204.2                                      | 1.8                                  | 204.1                                                             | 199.0                                      | 5.7                                  | 205.7                                                       | 200.6                                      | 3.2                                  | 202.5                                                               | 197.5                                      | 6.1                                  | 221.3                                                     | 215.8                                      | 3.9                                  |
| 232.6                                                                | 226.7                                      | 6.2                                  | 229.4                                                             | 223.6                                      | 23.7                                 | 228.2                                                       | 222.5                                      | 18.0                                 | 230.8                                                               | 225.1                                      | 15.8                                 | 230.7                                                     | 225.0                                      | 1.7                                  |
| 238.9                                                                | 233.0                                      | 22.5                                 | 229.7                                                             | 224.0                                      | 15.4                                 | 235.7                                                       | 229.8                                      | 29.3                                 | 233.1                                                               | 227.3                                      | 24.9                                 | 234.5                                                     | 228.7                                      | 10.5                                 |
| 246.8                                                                | 240.6                                      | 18.9                                 | 240.3                                                             | 234.3                                      | 13.0                                 | 240.3                                                       | 234.3                                      | 4.6                                  | 238.7                                                               | 232.7                                      | 9.7                                  | 244.2                                                     | 238.1                                      | 32.1                                 |
| 249.6                                                                | 243.3                                      | 7.0                                  | 249.5                                                             | 243.2                                      | 22.8                                 | 248.2                                                       | 242.0                                      | 4.8                                  | 249.4                                                               | 243.2                                      | 1.4                                  | 249.5                                                     | 243.3                                      | 9.6                                  |
| 269.2                                                                | 262.4                                      | 53.3                                 | 249.8                                                             | 243.6                                      | 26.6                                 | 287.2                                                       | 280.0                                      | 68.4                                 | 252.0                                                               | 245.7                                      | 46.2                                 | 293.9                                                     | 286.6                                      | 67.2                                 |
| 406.9                                                                | 396.7                                      | 19.0                                 | 407.1                                                             | 396.9                                      | 23.2                                 | 359.0                                                       | 350.0                                      | 2.8                                  | 407.9                                                               | 397.7                                      | 23.0                                 | 364.5                                                     | 355.4                                      | 6.5                                  |
| 411.3                                                                | 401.0                                      | 30.9                                 | 409.3                                                             | 399.1                                      | 4.7                                  | 367.1                                                       | 357.9                                      | 30.1                                 | 408.9                                                               | 398.7                                      | 5.4                                  | 407.8                                                     | 397.6                                      | 15.2                                 |
| 430.5                                                                | 419.7                                      | 45.6                                 | 429.4                                                             | 418.7                                      | 112.1                                | 408.8                                                       | 398.6                                      | 14.5                                 | 429.3                                                               | 418.6                                      | 110.2                                | 440.7                                                     | 429.7                                      | 76.3                                 |
| 442.5                                                                | 431.4                                      | 37.8                                 | 440.8                                                             | 429.8                                      | 11.5                                 | 438.3                                                       | 427.3                                      | 61.4                                 | 440.8                                                               | 429.8                                      | 12.4                                 | 451.0                                                     | 439.7                                      | 30.6                                 |
| 486.6                                                                | 474.4                                      | 58.7                                 | 460.7                                                             | 449.2                                      | 16.2                                 | 474.5                                                       | 462.7                                      | 2.2                                  | 448.0                                                               | 436.8                                      | 14.1                                 | 477.3                                                     | 465.3                                      | 0.4                                  |
| 541.3                                                                | 527.8                                      | 31.2                                 | 537.4                                                             | 523.9                                      | 22.5                                 | 490.1                                                       | 477.8                                      | 3.0                                  | 538.6                                                               | 525.1                                      | 7.5                                  | 505.6                                                     | 493.0                                      | 48.4                                 |
| 541.7                                                                | 528.1                                      | 18.3                                 | 537.8                                                             | 524.4                                      | 6.5                                  | 513.7                                                       | 500.8                                      | 0.7                                  | 539.0                                                               | 525.5                                      | 23.3                                 | 539.9                                                     | 526.4                                      | 14.0                                 |
| 568.1                                                                | 553.9                                      | 0.0                                  | 543.0                                                             | 529.4                                      | 92.0                                 | 537.3                                                       | 523.9                                      | 33.9                                 | 557.5                                                               | 543.6                                      | 17.5                                 | 560.5                                                     | 546.4                                      | 0.9                                  |
| 568.9                                                                | 554.7                                      | 3.3                                  | 567.8                                                             | 553.6                                      | 0.1                                  | 539.0                                                       | 525.5                                      | 18.1                                 | 568.2                                                               | 554.0                                      | 0.1                                  | 568.6                                                     | 554.4                                      | 0.2                                  |
| 594.9                                                                | 580.0                                      | 1.3                                  | 568.0                                                             | 553.8                                      | 0.0                                  | 568.0                                                       | 553.8                                      | 0.0                                  | 568.3                                                               | 554.1                                      | 0.1                                  | 612.6                                                     | 597.2                                      | 7.4                                  |
| 630.7                                                                | 614.9                                      | 13.9                                 | 606.4                                                             | 591.2                                      | 18.6                                 | 614.4                                                       | 599.1                                      | 6.0                                  | 595.7                                                               | 580.8                                      | 60.1                                 | 627.8                                                     | 612.1                                      | 7.2                                  |
| 657.7                                                                | 641.3                                      | 46.6                                 | 627.0                                                             | 611.3                                      | 22.3                                 | 656.7                                                       | 640.3                                      | 18.6                                 | 656.4                                                               | 640.0                                      | 62.4                                 | 650.2                                                     | 634.0                                      | 0.7                                  |
| 664.0                                                                | 647.4                                      | 13.4                                 | 656.5                                                             | 640.1                                      | 64.7                                 | 660.8                                                       | 644.3                                      | 44.9                                 | 662.7                                                               | 646.2                                      | 7.5                                  | 661.0                                                     | 644.5                                      | 48.3                                 |
| 670.2                                                                | 653.5                                      | 3.6                                  | 662.7                                                             | 646.2                                      | 7.0                                  | 671.5                                                       | 654.7                                      | 4.7                                  | 671.1                                                               | 654.3                                      | 4.0                                  | 671.3                                                     | 654.5                                      | 6.6                                  |
| 671.8                                                                | 655.0                                      | 4.5                                  | 671.4                                                             | 654.6                                      | 3.8                                  | 695.8                                                       | 678.4                                      | 91.1                                 | 671.4                                                               | 654.6                                      | 4.0                                  | 703.2                                                     | 685.6                                      | 100.2                                |
| 823.7                                                                | 803.1                                      | 17.0                                 | 671.5                                                             | 654.7                                      | 4.8                                  | 785.0                                                       | 765.4                                      | 5.3                                  | 711.0                                                               | 693.2                                      | 123.3                                | 823.2                                                     | 802.6                                      | 54.2                                 |
| 829.2                                                                | 808.5                                      | 16.3                                 | 820.2                                                             | 799.7                                      | 12.6                                 | 822.2                                                       | 801.7                                      | 17.8                                 | 821.8                                                               | 801.2                                      | 15.5                                 | 825.9                                                     | 805.3                                      | 17.7                                 |
| 930.0                                                                | 906.7                                      | 1.5                                  | 820.5                                                             | 800.0                                      | 23.5                                 | 854.9                                                       | 833.5                                      | 3.3                                  | 822.3                                                               | 801.7                                      | 20.1                                 | 854.6                                                     | 833.2                                      | 38.7                                 |
| 951.2                                                                | 927.4                                      | 41.0                                 | 911.7                                                             | 888.9                                      | 10.3                                 | 886.1                                                       | 864.0                                      | 3.7                                  | 905.3                                                               | 882.6                                      | 24.4                                 | 938.2                                                     | 914.8                                      | 17.7                                 |
| 952.7                                                                | 928.9                                      | 16.0                                 | 950.5                                                             | 926.8                                      | 36.0                                 | 945.3                                                       | 921.7                                      | 8.4                                  | 950.6                                                               | 926.9                                      | 33.1                                 | 943.7                                                     | 920.1                                      | 6.0                                  |
| 960.2                                                                | 936.2                                      | 19.9                                 | 951.8                                                             | 928.0                                      | 4.7                                  | 951.9                                                       | 928.1                                      | 22.3                                 | 951.9                                                               | 928.1                                      | 7.5                                  | 952.2                                                     | 928.4                                      | 22.5                                 |
| 960.9                                                                | 936.9                                      | 7.8                                  | 960.6                                                             | 936.6                                      | 18.8                                 | 961.2                                                       | 937.1                                      | 10.1                                 | 959.9                                                               | 935.9                                      | 22.0                                 | 960.6                                                     | 936.6                                      | 13.3                                 |
| 1029.0                                                               | 1003.3                                     | 62.4                                 | 961.3                                                             | 937.3                                      | 2.2                                  | 968.1                                                       | 943.9                                      | 6.0                                  | 960.6                                                               | 936.6                                      | 2.2                                  | 970.6                                                     | 946.3                                      | 43.8                                 |
| 1037.4                                                               | 1011.5                                     | 4.3                                  | 1018.5                                                            | 993.1                                      | 1.5                                  | 987.2                                                       | 962.5                                      | 17.6                                 | 1036.6                                                              | 1010.7                                     | 1.5                                  | 1026.9                                                    | 1001.3                                     | 10.8                                 |
| 1039.2                                                               | 1013.2                                     | 10.9                                 | 1036.5                                                            | 1010.6                                     | 2.4                                  | 1026.4                                                      | 1000.7                                     | 10.6                                 | 1037.2                                                              | 1011.3                                     | 7.8                                  | 1035.5                                                    | 1009.6                                     | 47.8                                 |
| 1044.3                                                               | 1018.2                                     | 12.2                                 | 1037.1                                                            | 1011.2                                     | 6.9                                  | 1030.1                                                      | 1004.3                                     | 11.2                                 | 1039.3                                                              | 1013.3                                     | 38.5                                 | 1037.0                                                    | 1011.1                                     | 6.4                                  |
| 1044.9                                                               | 1018.8                                     | 20.6                                 | 1044.8                                                            | 1018.7                                     | 6.0                                  | 1037.0                                                      | 1011.1                                     | 5.1                                  | 1044.7                                                              | 1018.6                                     | 5.4                                  | 1040.4                                                    | 1014.4                                     | 8.7                                  |
| 1046.2                                                               | 1020.1                                     | 85.9                                 | 1045.1                                                            | 1019.0                                     | 22.1                                 | 1045.2                                                      | 1019.1                                     | 16.3                                 | 1045.0                                                              | 1018.9                                     | 22.2                                 | 1044.8                                                    | 1018.7                                     | 16.2                                 |
| 1048.7                                                               | 1022.5                                     | 103.1                                | 1047.0                                                            | 1020.9                                     | 135.9                                | 1049.4                                                      | 1023.1                                     | 79.6                                 | 1046.7                                                              | 1020.6                                     | 138.1                                | 1045.2                                                    | 1019.1                                     | 16.3                                 |
| 1050.6                                                               | 1024.4                                     | 22.8                                 | 1050.6                                                            | 1024.3                                     | 19.1                                 | 1058.8                                                      | 1032.3                                     | 6.1                                  | 1050.2                                                              | 1024.0                                     | 18.0                                 | 1049.5                                                    | 1023.2                                     | 78.7                                 |
| 1058.7                                                               | 1032.2                                     | 0.1                                  | 1058.6                                                            | 1032.1                                     | 0.2                                  | 1071.3                                                      | 1044.5                                     | 0.8                                  | 1058.5                                                              | 1032.0                                     | 0.1                                  | 1058.4                                                    | 1031.9                                     | 0.4                                  |
| 1059.5                                                               | 1033.0                                     | 6.9                                  | 1058.7                                                            | 1032.3                                     | 0.1                                  | 1081.8                                                      | 1054.7                                     | 10.6                                 | 1058.6                                                              | 1032.2                                     | 0.1                                  | 1059.1                                                    | 1032.6                                     | 0.3                                  |

|        |        |        |        |        |        |        |        |       |        |        |        |        |        |       |
|--------|--------|--------|--------|--------|--------|--------|--------|-------|--------|--------|--------|--------|--------|-------|
| 1071.8 | 1045.0 | 6.4    | 1069.0 | 1042.3 | 7.5    | 1185.8 | 1156.2 | 90.5  | 1071.3 | 1044.5 | 11.5   | 1071.4 | 1044.6 | 10.5  |
| 1222.0 | 1191.5 | 3.4    | 1221.5 | 1191.0 | 117.0  | 1207.6 | 1177.5 | 2.0   | 1222.8 | 1192.3 | 2.1    | 1206.5 | 1176.3 | 74.1  |
| 1224.8 | 1194.2 | 2.8    | 1222.7 | 1192.1 | 2.7    | 1222.6 | 1192.1 | 3.0   | 1224.0 | 1193.4 | 8.5    | 1221.7 | 1191.2 | 3.5   |
| 1300.4 | 1267.9 | 176.4  | 1223.2 | 1192.6 | 10.6   | 1245.1 | 1214.0 | 28.7  | 1230.6 | 1199.8 | 119.2  | 1236.4 | 1205.5 | 151.4 |
| 1306.6 | 1274.0 | 73.0   | 1301.5 | 1269.0 | 200.8  | 1305.6 | 1272.9 | 115.2 | 1301.1 | 1268.5 | 201.1  | 1306.1 | 1273.4 | 129.5 |
| 1379.8 | 1345.3 | 220.6  | 1306.8 | 1274.2 | 17.4   | 1366.2 | 1332.0 | 39.0  | 1306.3 | 1273.6 | 21.3   | 1381.6 | 1347.1 | 347.4 |
| 1383.6 | 1349.0 | 131.7  | 1370.8 | 1336.5 | 184.5  | 1388.2 | 1353.5 | 24.0  | 1386.3 | 1351.6 | 164.0  | 1385.7 | 1351.1 | 321.5 |
| 1391.2 | 1356.4 | 516.5  | 1388.5 | 1353.8 | 120.0  | 1389.2 | 1354.4 | 400.2 | 1391.1 | 1356.3 | 189.8  | 1390.0 | 1355.2 | 124.2 |
| 1404.7 | 1369.6 | 0.6    | 1397.0 | 1362.1 | 527.3  | 1397.9 | 1363.0 | 90.9  | 1397.4 | 1362.4 | 348.0  | 1403.2 | 1368.1 | 48.5  |
| 1405.6 | 1370.5 | 7.8    | 1404.7 | 1369.5 | 0.8    | 1403.1 | 1368.1 | 129.3 | 1404.8 | 1369.6 | 1.5    | 1405.0 | 1369.9 | 5.3   |
| 1407.7 | 1372.5 | 5.1    | 1405.0 | 1369.9 | 3.4    | 1404.8 | 1369.7 | 0.3   | 1405.1 | 1370.0 | 1.5    | 1407.7 | 1372.5 | 5.3   |
| 1409.9 | 1374.7 | 15.3   | 1407.3 | 1372.1 | 2.0    | 1407.6 | 1372.5 | 19.6  | 1407.4 | 1372.3 | 0.7    | 1416.4 | 1381.0 | 83.4  |
| 1413.2 | 1377.9 | 118.1  | 1411.5 | 1376.3 | 158.6  | 1432.6 | 1396.8 | 87.9  | 1411.3 | 1376.1 | 115.3  | 1435.5 | 1399.6 | 47.3  |
| 1453.4 | 1417.1 | 107.1  | 1424.4 | 1388.8 | 171.0  | 1451.4 | 1415.1 | 113.2 | 1444.4 | 1408.3 | 160.4  | 1447.3 | 1411.2 | 155.0 |
| 1470.6 | 1433.8 | 9.1    | 1466.8 | 1430.1 | 21.9   | 1456.6 | 1420.2 | 0.1   | 1468.8 | 1432.1 | 50.5   | 1463.3 | 1426.8 | 212.6 |
| 1471.2 | 1434.4 | 0.0    | 1471.9 | 1435.1 | 2.9    | 1457.8 | 1421.4 | 42.4  | 1471.6 | 1434.8 | 2.0    | 1467.4 | 1430.8 | 12.1  |
| 1472.0 | 1435.2 | 20.7   | 1472.0 | 1435.2 | 5.0    | 1466.5 | 1429.8 | 9.0   | 1471.7 | 1434.9 | 9.2    | 1470.7 | 1433.9 | 4.0   |
| 1474.5 | 1437.6 | 14.2   | 1473.1 | 1436.2 | 9.1    | 1467.0 | 1430.3 | 20.1  | 1472.7 | 1435.9 | 17.1   | 1471.8 | 1435.0 | 19.9  |
| 1476.9 | 1440.0 | 51.8   | 1473.1 | 1436.3 | 22.6   | 1470.3 | 1433.5 | 108.8 | 1474.0 | 1437.1 | 13.1   | 1474.6 | 1437.8 | 23.0  |
| 1479.0 | 1442.0 | 222.9  | 1479.4 | 1442.4 | 6.9    | 1471.7 | 1434.9 | 0.6   | 1479.3 | 1442.4 | 249.1  | 1480.0 | 1443.0 | 157.3 |
| 1480.7 | 1443.7 | 68.7   | 1479.7 | 1442.7 | 259.1  | 1472.4 | 1435.6 | 24.0  | 1481.1 | 1444.1 | 45.1   | 1483.8 | 1446.7 | 10.4  |
| 1485.8 | 1448.7 | 5.2    | 1481.5 | 1444.4 | 39.8   | 1480.7 | 1443.7 | 170.7 | 1486.6 | 1449.5 | 3.5    | 1486.0 | 1448.9 | 13.4  |
| 1488.0 | 1450.8 | 9.3    | 1486.9 | 1449.7 | 2.0    | 1486.3 | 1449.1 | 0.1   | 1487.3 | 1450.2 | 3.0    | 1490.7 | 1453.4 | 120.1 |
| 1528.5 | 1490.3 | 163.9  | 1487.4 | 1450.2 | 1.7    | 1493.2 | 1455.9 | 298.6 | 1489.3 | 1452.1 | 51.2   | 1498.5 | 1461.1 | 211.7 |
| 1565.2 | 1526.1 | 348.0  | 1567.2 | 1528.0 | 771.3  | 1544.8 | 1506.2 | 230.1 | 1565.6 | 1526.4 | 525.0  | 1531.5 | 1493.2 | 217.0 |
| 1569.8 | 1530.5 | 683.8  | 1567.3 | 1528.2 | 191.5  | 1569.4 | 1530.2 | 495.0 | 1568.6 | 1529.4 | 453.2  | 1568.6 | 1529.4 | 534.7 |
| 1586.8 | 1547.2 | 828.7  | 1589.4 | 1549.7 | 1226.9 | 1595.2 | 1555.3 | 747.9 | 1587.5 | 1547.8 | 1181.1 | 1574.4 | 1535.0 | 780.8 |
| 1603.5 | 1563.4 | 484.1  | 1610.8 | 1570.6 | 243.0  | 1700.8 | 1658.3 | 1.5   | 1607.2 | 1567.0 | 302.6  | 1594.2 | 1554.3 | 295.4 |
| 1674.4 | 1632.6 | 570.7  | 1763.1 | 1719.0 | 673.7  | 1768.5 | 1724.3 | 589.1 | 1712.3 | 1669.5 | 737.0  | 1615.7 | 1575.3 | 613.5 |
| 2963.6 | 2889.5 | 1852.3 | 3052.1 | 2975.8 | 0.6    | 2999.7 | 2924.7 | 35.2  | 3051.4 | 2975.1 | 1.6    | 3048.0 | 2971.8 | 1.3   |
| 3047.4 | 2971.2 | 0.1    | 3052.1 | 2975.8 | 0.0    | 3041.9 | 2965.8 | 7.9   | 3051.9 | 2975.6 | 0.6    | 3052.2 | 2975.9 | 0.4   |
| 3052.0 | 2975.7 | 0.5    | 3052.1 | 2975.8 | 1.6    | 3042.2 | 2966.2 | 3.8   | 3052.5 | 2976.1 | 0.4    | 3052.4 | 2976.1 | 0.2   |
| 3052.6 | 2976.3 | 0.1    | 3052.1 | 2975.8 | 1.1    | 3052.0 | 2975.7 | 0.2   | 3052.6 | 2976.2 | 0.5    | 3055.4 | 2979.0 | 3.7   |
| 3052.9 | 2976.6 | 0.2    | 3055.9 | 2979.5 | 3.3    | 3052.1 | 2975.8 | 0.8   | 3060.5 | 2984.0 | 3.4    | 3060.8 | 2984.3 | 1.0   |
| 3061.6 | 2985.1 | 0.8    | 3112.2 | 3034.4 | 1.5    | 3063.4 | 2986.8 | 0.3   | 3111.5 | 3033.7 | 2.6    | 3109.2 | 3031.4 | 0.6   |
| 3107.1 | 3029.4 | 1.2    | 3112.2 | 3034.4 | 1.5    | 3100.0 | 3022.5 | 0.1   | 3111.7 | 3033.9 | 1.7    | 3112.1 | 3034.3 | 0.7   |
| 3111.7 | 3033.9 | 1.4    | 3112.6 | 3034.8 | 2.4    | 3100.1 | 3022.6 | 0.0   | 3112.6 | 3034.8 | 1.6    | 3112.2 | 3034.4 | 1.9   |
| 3112.9 | 3035.1 | 1.1    | 3112.6 | 3034.8 | 2.8    | 3112.3 | 3034.5 | 0.9   | 3113.1 | 3035.2 | 1.8    | 3114.9 | 3037.0 | 0.1   |
| 3113.0 | 3035.2 | 0.7    | 3120.2 | 3042.2 | 0.3    | 3112.4 | 3034.6 | 2.4   | 3136.6 | 3058.2 | 1.8    | 3134.7 | 3056.3 | 1.8   |
| 3140.1 | 3061.6 | 0.7    | 3159.8 | 3080.9 | 19.7   | 3130.9 | 3052.6 | 1.0   | 3160.6 | 3081.6 | 12.7   | 3163.0 | 3083.9 | 12.9  |
| 3162.7 | 3083.6 | 15.2   | 3160.0 | 3081.0 | 10.3   | 3139.9 | 3061.4 | 2.0   | 3161.2 | 3082.2 | 18.2   | 3163.4 | 3084.3 | 6.1   |
| 3163.0 | 3083.9 | 4.7    | 3160.3 | 3081.3 | 6.5    | 3161.0 | 3082.0 | 14.9  | 3161.4 | 3082.4 | 2.1    | 3165.6 | 3086.5 | 4.9   |
| 3163.5 | 3084.4 | 6.8    | 3160.4 | 3081.4 | 5.9    | 3161.4 | 3082.4 | 6.2   | 3161.6 | 3082.5 | 6.9    | 3175.1 | 3095.8 | 4.7   |
| 3164.3 | 3085.2 | 6.8    | 3188.3 | 3108.6 | 0.4    | 3176.9 | 3097.5 | 4.2   | 3184.3 | 3104.7 | 1.9    | 3179.9 | 3100.4 | 1.0   |
| 3188.2 | 3108.5 | 0.1    | 3232.6 | 3151.8 | 1.4    | 3178.3 | 3098.8 | 1.5   | 3233.4 | 3152.5 | 1.1    | 3234.7 | 3153.8 | 0.5   |
| 3234.7 | 3153.9 | 0.6    | 3232.7 | 3151.9 | 1.1    | 3178.7 | 3099.2 | 1.5   | 3233.5 | 3152.7 | 0.8    | 3245.9 | 3164.7 | 0.4   |
| 3235.0 | 3154.2 | 0.3    | 3774.2 | 3679.8 | 150.8  | 3233.7 | 3152.8 | 1.0   | 3722.9 | 3629.9 | 107.9  | 3494.3 | 3406.9 | 253.8 |



## Atom coordinates of all presented structures with 5 spin multiplicity, as presented in Figures 1, 2, 4, S4, S5, S6 and S7.

m/z 363, [Ho(acac-H)<sub>2</sub>]<sup>+</sup>, +0.0 kJ/mol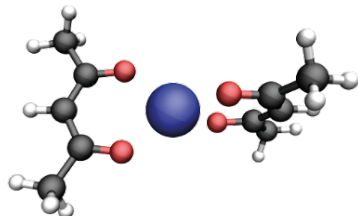

|    |               |               |               |
|----|---------------|---------------|---------------|
| Ho | 0.0016819728  | -0.0012426710 | -0.0035943216 |
| C  | 3.7229882122  | -1.7892500385 | 1.7832461819  |
| C  | 2.9246594229  | -0.8901146055 | 0.8878075483  |
| O  | 1.6324388284  | -0.9939987598 | 0.9879906761  |
| C  | 3.5630956178  | -0.0009445249 | 0.0039680344  |
| C  | 2.9284331879  | 0.8880617264  | -0.8828462568 |
| C  | 3.7306987089  | 1.7879481454  | -1.7740134700 |
| O  | 1.6367144211  | 0.9914580780  | -0.9890255878 |
| H  | 3.4534520572  | -1.5911682412 | 2.8269722007  |
| H  | 4.7982515111  | -1.6607429426 | 1.6559680135  |
| H  | 3.4541736361  | -2.8322346262 | 1.5803340309  |
| H  | 4.6457326398  | -0.0007228926 | 0.0065169453  |
| H  | 4.8053974370  | 1.6574392786  | -1.6440282723 |
| H  | 3.4631551793  | 2.8309006360  | -1.5690844985 |
| H  | 3.4635908001  | 1.5930600328  | -2.8189280159 |
| C  | -3.7347255800 | -1.7751211086 | -1.7808927379 |
| C  | -2.9312993279 | -0.8815848790 | -0.8842790882 |
| O  | -1.6398906618 | -0.9859050667 | -0.9904001827 |
| C  | -3.5646753369 | 0.0046167847  | 0.0060900692  |
| C  | -2.9232333533 | 0.8885746479  | 0.8927239464  |
| C  | -3.7182851918 | 1.7847973679  | 1.7940864250  |
| O  | -1.6307703118 | 0.9884594731  | 0.9915733818  |
| H  | -4.8092460128 | -1.6406161055 | -1.6534618078 |
| H  | -3.4722337697 | -2.8198672464 | -1.5785187776 |
| H  | -3.4638443794 | -1.5780330049 | -2.8244020229 |
| H  | -4.6473032591 | 0.0064274408  | 0.0092363004  |
| H  | -3.4537575444 | 2.8286716442  | 1.5898483540  |
| H  | -3.4416157102 | 1.5870904483  | 2.8359544920  |
| H  | -4.7939851934 | 1.6536690092  | 1.6732624400  |

m/z 381, [Ho(acac-H)<sub>2</sub>(H<sub>2</sub>O)]<sup>+</sup>, +0.0 kJ/mol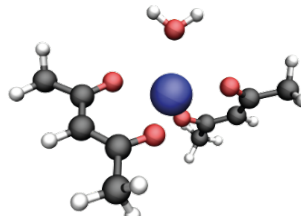

|    |               |               |               |
|----|---------------|---------------|---------------|
| Ho | 0.0000508356  | -0.2886490514 | -0.1497243965 |
| C  | 3.0417653733  | 0.8267971387  | 2.9808287609  |
| C  | 2.5738429158  | 0.4889756005  | 1.5952103086  |
| O  | 1.3130109737  | 0.2005534247  | 1.4797404302  |
| C  | 3.4651031390  | 0.4946068826  | 0.5112543356  |
| C  | 3.1336194918  | 0.1769067564  | -0.8216565480 |
| C  | 4.1812619517  | 0.2334807583  | -1.8980959559 |
| O  | 1.9482188253  | -0.1749441971 | -1.1961667986 |
| H  | 4.1087081823  | 1.0494462867  | 3.0198210131  |
| H  | 2.8199679207  | -0.0105209630 | 3.6520438386  |
| H  | 2.4770958417  | 1.6891579469  | 3.3530446374  |
| H  | 4.4934913549  | 0.7637574318  | 0.7165551903  |
| H  | 5.1603283530  | 0.5264397694  | -1.5171290774 |
| H  | 3.8657178151  | 0.9448500268  | -2.6697185935 |
| H  | 4.2605983203  | -0.7460582999 | -2.3828330313 |
| C  | -4.1819639390 | -1.4113627802 | 1.2875147051  |
| C  | -3.1339892015 | -0.5663954175 | 0.6187168401  |
| O  | -1.9482646801 | -1.0749231152 | 0.5504760066  |
| C  | -3.4653087047 | 0.7040972911  | 0.1053885022  |
| C  | -2.5739198333 | 1.5841662498  | -0.5272847960 |
| C  | -3.0413126691 | 2.9101919001  | -1.0528533586 |
| O  | -1.3132287475 | 1.3225480689  | -0.6958461469 |
| H  | -5.1611265131 | -0.9312995471 | 1.3051067764  |
| H  | -3.8671108325 | -1.6286789217 | 2.3144722560  |
| H  | -4.2608433340 | -2.3736826393 | 0.7693450753  |
| H  | -4.4936247125 | 1.0275541431  | 0.2059233478  |
| H  | -2.8200800630 | 2.9734396346  | -2.1242318135 |
| H  | -2.4758941783 | 3.7122211471  | -0.5648582940 |
| H  | -4.1080536579 | 3.0714484256  | -0.8930795367 |
| O  | 0.0011287680  | -2.3980566222 | -1.2297839314 |
| H  | 0.7064821303  | -2.7429332811 | -1.7964325560 |
| H  | -0.7051221261 | -3.0584210474 | -1.1777341897 |

m/z 381, [Ho(acac-H)(acac-diketo)(OH)]<sup>+</sup>, +49.2 kJ/mol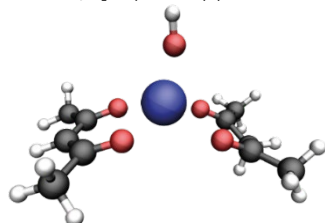

|    |               |               |               |
|----|---------------|---------------|---------------|
| Ho | 0.1160108815  | 0.0002802243  | -0.5725745163 |
| C  | 3.5616157231  | -2.5254429942 | 0.9516752952  |
| C  | 2.8239778496  | -1.2479432204 | 0.6610736502  |
| O  | 1.6243744393  | -1.3781124496 | 0.2004880117  |
| C  | 3.4337237522  | -0.0012538753 | 0.8901409548  |
| C  | 2.8251627640  | 1.2459986157  | 0.6610180612  |
| C  | 3.5639610284  | 2.5228180658  | 0.9516508176  |
| O  | 1.6257026014  | 1.3772609430  | 0.2003586568  |
| H  | 4.5571115392  | -2.3510084845 | 1.3622882481  |
| H  | 3.6487540477  | -3.1083063151 | 0.0277184240  |
| H  | 2.9784522860  | -3.1300685837 | 1.6549606244  |
| H  | 4.4445455257  | -0.0017257347 | 1.2781190787  |
| H  | 4.5592935794  | 2.3474648875  | 1.3622683729  |
| H  | 2.9813454343  | 3.1279529872  | 1.6549537609  |
| H  | 3.6516334067  | 3.1056299637  | 0.0277131456  |
| C  | -3.7114637246 | -2.5174125401 | 0.6910407604  |
| C  | -2.8328355201 | -1.3068282653 | 0.6337192388  |
| O  | -1.6870739996 | -1.3733888224 | 0.1891668211  |
| C  | -3.4123376709 | 0.0002555559  | 1.1648901385  |
| C  | -2.8323286325 | 1.3074973160  | 0.6347025682  |
| C  | -3.7105032997 | 2.5183678267  | 0.6928052684  |
| O  | -1.6865077632 | 1.3739438864  | 0.1902556794  |
| H  | -4.2265769581 | -2.5854848157 | 1.6556191889  |
| H  | -3.1296900882 | -3.4197022906 | 0.5004448086  |
| H  | -4.4916759869 | -2.4233949327 | -0.0770422537 |
| H  | -4.5023574153 | 0.0005095450  | 1.0629422672  |
| H  | -4.4906837207 | 2.4251856321  | -0.0754132106 |
| H  | -3.1283823804 | 3.4205803283  | 0.5029053862  |
| H  | -4.2256805035 | 2.5859382999  | 1.6573845858  |
| O  | -0.0627244781 | 0.0004273954  | -2.5675871342 |
| H  | 0.0901937816  | 0.0007745954  | -3.5149242158 |
| H  | -3.2320674983 | -0.0001867440 | 2.2537075168  |

m/z 381, [Ho(acac-H)(acac-enol)(OH)]<sup>+</sup>, +75.0 kJ/mol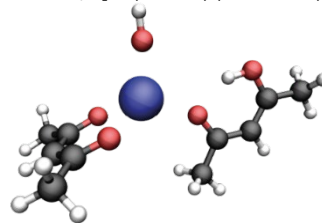

|    |               |               |               |
|----|---------------|---------------|---------------|
| Ho | -0.3596230031 | 0.6347950718  | 0.0003491130  |
| C  | 1.6654648818  | -2.7549052429 | 0.0001632034  |
| C  | 2.3924207811  | -1.4413782892 | 0.0001584262  |
| O  | 1.6804336776  | -0.3564516454 | 0.0003120146  |
| C  | 3.7966430499  | -1.3936081073 | -0.0000231019 |
| C  | 4.5310126062  | -0.2053127995 | 0.0000216641  |
| C  | 6.0190861292  | -0.1581117205 | -0.0002357116 |
| O  | 3.9558803754  | 0.9769790584  | 0.0003402360  |
| H  | 1.0211590407  | -2.8198602349 | 0.8851043523  |
| H  | 2.3473275274  | -3.6060573462 | -0.000015020  |
| H  | 1.0208938105  | -2.8197333029 | -0.8845936769 |
| H  | 4.3451392626  | -2.3261419746 | -0.0002152909 |
| H  | 6.4574180883  | -1.1559852412 | -0.0004629989 |
| H  | 6.3661799109  | 0.3948881556  | 0.8800606111  |
| H  | 6.3658630249  | 0.3951486923  | -0.8804935892 |
| C  | -3.7923731714 | -0.8499764849 | -2.5233052760 |
| C  | -3.0515578045 | -0.5608259791 | -1.2498606257 |
| O  | -1.8405432915 | -0.1206759984 | -1.3854163922 |
| C  | -3.6614676832 | -0.7701125161 | 0.0002662124  |
| C  | -3.0514051173 | -0.5613250764 | 1.2503979431  |
| C  | -3.7920685723 | -0.8509443281 | 2.5238240106  |
| O  | -1.8403564624 | -0.1212667707 | 1.3859770416  |
| H  | -4.7927788222 | -1.2463719191 | -2.3457488173 |
| H  | -3.2185099196 | -1.5638572392 | -3.1245327921 |
| H  | -3.8674638048 | 0.0714918585  | -3.1120639299 |
| H  | -4.6787136159 | -1.1407932242 | 0.0002541749  |
| H  | -3.8670067995 | 0.0702863280  | 3.1129731157  |
| H  | -3.2181783048 | -1.5651180437 | 3.1246784594  |
| H  | -4.7925281848 | -1.2471920309 | 2.3462413385  |
| H  | 2.9771164775  | 0.8561435573  | 0.0005699841  |
| O  | -0.0790796939 | 2.6134055608  | 0.0007541972  |
| H  | -0.0746393926 | 3.5732622328  | 0.0009266053  |

m/z 395, [Ho(acac-H)<sub>2</sub>(MeOH)]<sup>+</sup>, +0.0 kJ/mol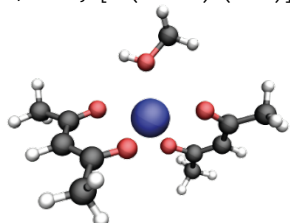

|    |               |               |               |
|----|---------------|---------------|---------------|
| Ho | 0.0210581515  | 0.1925650282  | -0.0098658651 |
| C  | -2.9236824324 | -2.1089054692 | 2.5116127520  |
| C  | -2.4896798253 | -1.2828947665 | 1.3356614893  |
| O  | -1.2491262417 | -0.9014774973 | 1.3400372488  |
| C  | -3.3905002559 | -0.9617050020 | 0.3083081927  |
| C  | -3.0891387522 | -0.1815059115 | -0.8263496983 |
| C  | -4.1398060766 | 0.0805882531  | -1.8688387112 |
| O  | -1.9285633118 | 0.3437657310  | -1.0397101895 |
| H  | -3.9760415722 | -2.3906678151 | 2.4597979795  |
| H  | -2.7421587806 | -1.5478444002 | 3.4352058009  |
| H  | -2.3079704725 | -3.0139768221 | 2.5646588841  |
| H  | -4.3998710421 | -1.3435058185 | 0.3956901024  |
| H  | -5.1001064501 | -0.3736073566 | -1.6216192090 |
| H  | -3.7934976752 | -0.3085713268 | -2.8330866209 |
| H  | -4.2715146702 | 1.1613057277  | -1.9922971825 |
| C  | 4.2439151937  | 0.7119949490  | 1.6826590344  |
| C  | 3.1841574420  | 0.1827934519  | 0.7562689899  |
| O  | 1.9998199440  | 0.6783828749  | 0.9004893479  |
| C  | 3.5064423277  | -0.7954240249 | -0.2053541849 |
| C  | 2.6048507404  | -1.3657237310 | -1.1176205193 |
| C  | 3.0638365295  | -2.3835668238 | -2.1212619277 |
| O  | 1.3441227065  | -1.0633857066 | -1.1553173298 |
| H  | 5.2177358501  | 0.2504331546  | 1.5145685856  |
| H  | 3.9353057248  | 0.5386458758  | 2.7196938662  |
| H  | 4.3338797685  | 1.7966608934  | 1.5540302740  |
| H  | 4.5350801878  | -1.1304711906 | -0.2485045604 |
| H  | 2.8307723770  | -2.0267348457 | -3.1307966710 |
| H  | 2.5023624210  | -3.3134872714 | -1.9764473226 |
| H  | 4.1320455380  | -2.5913435549 | -2.0483604922 |
| C  | -0.8391630975 | 3.6088111556  | -0.3063581270 |
| O  | 0.0689068234  | 2.5329313841  | 0.0687304509  |
| H  | -0.3428514951 | 4.2772745421  | -1.0127613093 |
| H  | -1.1545319935 | 4.1518849175  | 0.5869835171  |
| H  | -1.6955940571 | 3.1331333106  | -0.7818519501 |
| H  | 0.8794774761  | 2.8828760854  | 0.4695513552  |

m/z 395, [Ho(acac-H)(acac-diketo)(MeO)]<sup>+</sup>, +49.2 kJ/mol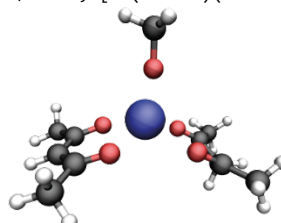

|    |               |               |               |
|----|---------------|---------------|---------------|
| Ho | -0.1203169810 | 0.1030915354  | 0.4440133124  |
| C  | -3.3911973640 | -2.7218343439 | -0.9500180102 |
| C  | -2.7224963474 | -1.3889025207 | -0.7522681151 |
| O  | -1.5333381005 | -1.4211611746 | -0.2523614767 |
| C  | -3.3859588526 | -0.1991003326 | -1.1063308077 |
| C  | -2.8480304591 | 1.0932129902  | -0.9732246753 |
| C  | -3.6393008475 | 2.2994052243  | -1.3980973944 |
| O  | -1.6724284872 | 1.3265235841  | -0.4921516323 |
| H  | -4.3808987688 | -2.6325754497 | -1.4001925120 |
| H  | -3.4791893930 | -3.2268272922 | 0.0185876169  |
| H  | -2.7595658638 | -3.3552199375 | -1.5825313146 |
| H  | -4.3829713135 | -0.2862664511 | -1.5195427058 |
| H  | -4.6103888584 | 2.0368373021  | -1.8202175890 |
| H  | -3.0642761000 | 2.8702646653  | -2.1354755056 |
| H  | -3.7870794950 | 2.9556739567  | -0.5329536157 |
| C  | 3.7183807575  | -2.5589026280 | -0.5234635454 |
| C  | 2.8306802082  | -1.3554008841 | -0.5982076741 |
| O  | 1.7066354973  | -1.3606285884 | -0.0992789952 |
| C  | 3.3744101949  | -0.1336413412 | -1.3354127545 |
| C  | 2.8300670544  | 1.2325992831  | -0.9326869508 |
| C  | 3.7233850526  | 2.4159281556  | -1.1369349016 |
| O  | 1.6954465577  | 1.3630549986  | -0.4725531915 |
| H  | 4.1726487020  | -2.7718999721 | -1.4977072753 |
| H  | 3.1585866741  | -3.4226850122 | -0.1638301746 |
| H  | 4.5445115739  | -2.3487685079 | 0.1696617690  |
| H  | 4.4684541920  | -0.1304444755 | -1.3126111974 |
| H  | 4.5398630349  | 2.3753479321  | -0.4027951843 |
| H  | 3.1655213661  | 3.3432526854  | -1.0041093809 |
| H  | 4.1915927119  | 2.3858495061  | -2.1273443557 |
| O  | -0.0453235266 | 0.2810956164  | 2.4286683567  |
| H  | 3.1112223398  | -0.2712655938 | -2.3982410662 |
| C  | -0.1928947229 | 0.4402575107  | 3.8217171616  |
| H  | 0.5024526923  | 1.2019972329  | 4.1965405413  |
| H  | -1.2146421054 | 0.7526045415  | 4.0713763477  |
| H  | 0.0164039771  | -0.5045512152 | 4.3387298965  |

m/z 395, [Ho(acac-H)(acac-enol)(MeO)]<sup>+</sup>, +88.2 kJ/mol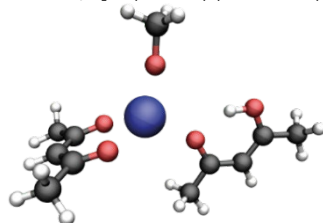

|    |               |               |               |
|----|---------------|---------------|---------------|
| Ho | -0.3659773378 | 0.4953094719  | -0.0041000044 |
| C  | 1.6693197089  | -2.8833442203 | 0.0093151723  |
| C  | 2.4008645106  | -1.5719562813 | 0.0052364340  |
| O  | 1.6949658559  | -0.4844847571 | 0.0010060259  |
| C  | 3.8062268843  | -1.5294212664 | 0.0059126161  |
| C  | 4.5408560313  | -0.3419594913 | 0.0024801674  |
| C  | 6.0290824685  | -0.2940057569 | 0.0033724267  |
| O  | 3.9640693843  | 0.8399832318  | -0.0018411928 |
| H  | 1.0236646555  | -2.9428765755 | 0.8936413747  |
| H  | 2.3482164854  | -3.7369070446 | 0.0133896599  |
| H  | 1.0259014714  | -2.9496462742 | -0.8761732186 |
| H  | 4.3527544394  | -2.4630950201 | 0.0094219946  |
| H  | 6.4676789530  | -1.2917984735 | 0.0071340494  |
| H  | 6.3753719253  | 0.2620526389  | 0.8820180636  |
| H  | 6.3765905225  | 0.2559137562  | -0.8786580234 |
| C  | -3.7800810504 | -1.0558577065 | -2.5222117457 |
| C  | -3.0407078210 | -0.7491738227 | -1.2513778522 |
| O  | -1.8406310692 | -0.2833751685 | -1.3922999901 |
| C  | -3.6437333203 | -0.9699457756 | 0.0004765034  |
| C  | -3.0409939432 | -0.7406460839 | 1.2509469682  |
| C  | -3.7806642864 | -1.0388340694 | 2.5236333760  |
| O  | -1.8409979932 | -0.2738168148 | 1.3890237938  |
| H  | -4.7721802460 | -1.4710012059 | -2.3407695869 |
| H  | -3.1944655414 | -1.7604224764 | -3.1230941598 |
| H  | -3.8746292777 | -0.1378005770 | -3.1134127944 |
| H  | -4.6525212279 | -1.3630970127 | 0.0017064480  |
| H  | -3.8752945607 | -0.1168761330 | 3.1087175517  |
| H  | -3.1952337580 | -1.7394338850 | 3.1293193676  |
| H  | -4.7727385045 | -1.4551320003 | 2.3447288600  |
| H  | 2.9847390900  | 0.7142200226  | -0.0021147746 |
| O  | -0.0773074718 | 2.4665266619  | -0.0104463133 |
| C  | -0.0918148407 | 3.8798766735  | -0.0152105046 |
| H  | 0.4192317303  | 4.2672539404  | 0.8741509075  |
| H  | -1.1216493231 | 4.2567464066  | -0.0176462975 |
| H  | 0.4213164565  | 4.2613350891  | -0.9059313025 |

m/z 423, [Ho(acac-H)<sub>2</sub>(CH<sub>3</sub>COOH-bonded)]<sup>+</sup>, +0.0 kJ/mol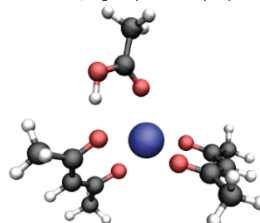

|    |               |               |               |
|----|---------------|---------------|---------------|
| Ho | 0.1512831232  | 0.0333267787  | -0.3803184239 |
| C  | -1.7893777261 | -3.9581093684 | -1.2662952963 |
| C  | -1.7349247564 | -2.5883176407 | -0.6543838735 |
| O  | -0.7207272949 | -1.8593216918 | -0.9757923343 |
| C  | -2.7537095202 | -2.1462132209 | 0.2128489614  |
| C  | -2.8437909163 | -0.8653533331 | 0.7719653787  |
| C  | -4.0203123663 | -0.4895280483 | 1.6288526922  |
| O  | -1.9516652275 | 0.0642165929  | 0.5807518773  |
| H  | -1.7784087899 | -3.8653743992 | -2.3581500675 |
| H  | -2.6723451204 | -4.5200314307 | -0.9596145870 |
| H  | -0.8879604140 | -4.5150980111 | -0.9869365028 |
| H  | -3.5548111970 | -2.8404360275 | 0.4326155596  |
| H  | -4.7118964751 | -1.3202927283 | 1.7729956559  |
| H  | -4.5645492824 | 0.3437414348  | 1.1678192528  |
| H  | -3.6651489325 | -0.1430238045 | 2.6058773861  |
| C  | 4.5315844224  | -0.1572862971 | -1.5611509275 |
| C  | 3.3642509848  | -0.1485790222 | -0.6166790776 |
| C  | 3.5607613603  | -0.2688359472 | 0.7743824058  |
| C  | 2.5380605857  | -0.2669738263 | 1.7333326884  |
| C  | 2.8528866024  | -0.3955495299 | 3.1960502292  |
| O  | 1.2774057273  | -0.1573476007 | 1.4383103683  |
| O  | 2.1960806184  | -0.0262941732 | -1.1492803558 |
| H  | 4.4139466627  | -0.9831111995 | -2.2718367215 |
| H  | 5.4876074143  | -0.2572320514 | -1.0457260859 |
| H  | 4.5293243684  | 0.7684143555  | -2.1474691419 |
| H  | -2.3168554174 | 1.6542405888  | 0.5819420384  |
| H  | 4.5787102142  | -0.3676801416 | 1.1295028550  |
| H  | 3.9234056809  | -0.4787862803 | 3.3876176297  |
| H  | 2.3425823556  | -1.2773414464 | 3.5997287209  |
| H  | 2.4548720142  | 0.4741457215  | 3.7308154370  |
| C  | -1.3693854975 | 3.0073728293  | -0.3757607110 |
| O  | -2.3726582290 | 2.6436811521  | 0.3738739653  |
| O  | -0.4795451252 | 2.1934037075  | -0.7278885337 |
| C  | -1.3254044266 | 4.4485402893  | -0.7637957582 |
| H  | -0.7508168391 | 4.5743042770  | -1.6817488364 |
| H  | -0.8223691391 | 5.0036824047  | 0.0377607765  |
| H  | -2.3339654417 | 4.8520150885  | -0.8673386435 |

m/z 423, [Ho(acac-H)2(CH3COOH-cis)]+, +17.8 kJ/mol

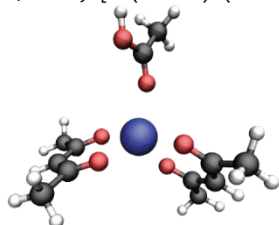

|    |               |               |               |
|----|---------------|---------------|---------------|
| Ho | 0.0200015570  | 0.0410981268  | -0.0248524850 |
| C  | -3.9557877557 | -1.0833588739 | -1.9702981166 |
| C  | -2.9371885039 | -1.0170004142 | -0.8655899497 |
| O  | -1.8651321460 | -0.3490736210 | -1.1150570857 |
| C  | -3.1747165916 | -1.6607065581 | 0.3658692227  |
| C  | -2.2920824034 | -1.6480680100 | 1.4565071637  |
| C  | -2.6453388879 | -2.3435627955 | 2.7411289832  |
| O  | -1.1417966648 | -1.0528539662 | 1.4365046660  |
| H  | -4.2432759534 | -0.0671327005 | -2.2617120825 |
| H  | -4.8473791399 | -1.6444853294 | -1.6868464803 |
| H  | -3.4998279388 | -1.5496721455 | -2.8509519945 |
| H  | -4.1091747137 | -2.1949939957 | 0.4825523794  |
| H  | -3.6281478029 | -2.8156126127 | 2.7049830242  |
| H  | -2.6190272492 | -1.6206854697 | 3.5640966522  |
| H  | -1.8864548512 | -3.1027730447 | 2.9614134605  |
| C  | 3.0472052290  | -2.4346840590 | -2.2933856330 |
| C  | 2.5753123957  | -1.5532584536 | -1.1711874609 |
| C  | 3.4365829060  | -1.2074883420 | -0.1185724289 |
| C  | 3.0877779611  | -0.3742574325 | 0.9634251656  |
| C  | 4.0911269324  | -0.0590790675 | 2.0386511814  |
| O  | 1.9216064939  | 0.1554851012  | 1.0957130922  |
| O  | 1.3468156777  | -1.1506408323 | -1.2507340554 |
| H  | 2.4177717101  | -3.3305946866 | -2.3380110757 |
| H  | 4.0907611316  | -2.7321813700 | -2.1814886423 |
| H  | 2.9189197255  | -1.9091196133 | -3.2461824322 |
| H  | -1.2700968974 | 4.6271528850  | 1.1735762832  |
| H  | 4.4438050686  | -1.6039103440 | -0.1438930772 |
| H  | 5.0621014831  | -0.5216745625 | 1.8560941918  |
| H  | 3.7025193575  | -0.4026988247 | 3.0039469543  |
| H  | 4.2145918522  | 1.0269396196  | 2.1137954269  |
| C  | -0.3990334922 | 3.4836278754  | -0.1081112473 |
| O  | -1.0560405432 | 3.6913290962  | 1.0266963659  |
| O  | -0.0813126282 | 2.3239645872  | -0.3777442513 |
| C  | -0.0796254171 | 4.6516955809  | -0.9928957421 |
| H  | 0.4481775361  | 4.3106957382  | -1.8824390611 |
| H  | 0.5453690555  | 5.3718661289  | -0.4525470779 |
| H  | -1.0023344925 | 5.1626723856  | -1.2902998338 |

m/z 423, [Ho(acac-H)(acac-diketo)(CH3COO)]+, +18.8 kJ/mol

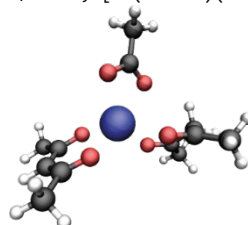

|    |               |               |               |
|----|---------------|---------------|---------------|
| Ho | 0.1638859698  | 0.2481627694  | -0.0542817104 |
| C  | 3.9802191657  | 0.0897436749  | 2.3657650273  |
| C  | 3.1190411700  | -0.1470734238 | 1.1578941660  |
| O  | 1.8754100912  | 0.1901565110  | 1.2722004399  |
| C  | 3.6595334233  | -0.7019053342 | -0.0144766585 |
| C  | 2.9330842743  | -0.9553571622 | -1.1926177577 |
| C  | 3.6098758219  | -1.5464599093 | -2.3971518606 |
| O  | 1.6719418312  | -0.7031756486 | -1.3163700720 |
| H  | 3.9668484548  | 1.1570518531  | 2.6142578336  |
| H  | 5.0114830109  | -0.2317765416 | 2.2141889268  |
| H  | 3.5550093523  | -0.4420017899 | 3.2241683691  |
| H  | 4.7131654245  | -0.9509759518 | -0.0114708845 |
| H  | 4.6656557431  | -1.7589137615 | -2.2236027713 |
| H  | 3.5143469084  | -0.8517555470 | -3.2394006259 |
| H  | 3.0950313208  | -2.4692501233 | -2.6864871558 |
| C  | -2.8182891382 | -2.3252678926 | 2.5328073105  |
| C  | -2.2796755293 | -1.5047791830 | 1.4047572791  |
| C  | -3.2577042381 | -1.0116384050 | 0.3465722033  |
| C  | -2.7390587653 | -1.0779104123 | -1.0859463471 |
| C  | -3.6886678277 | -1.5154904646 | -2.1558058781 |
| O  | -1.5782957263 | -0.7597521081 | -1.3516506327 |
| O  | -1.0821490232 | -1.2173871598 | 1.3386400192  |
| H  | -2.0353096852 | -2.5391206369 | 3.2605115963  |
| H  | -3.2320164750 | -3.2633520681 | 2.1404908937  |
| H  | -3.6499373761 | -1.7964706582 | 3.0147662379  |
| H  | -3.3991049271 | 0.0628704927  | 0.5590818122  |
| H  | -4.2273529768 | -1.5038240032 | 0.4413717644  |
| H  | -3.9865638631 | -2.5569455916 | -1.9770312495 |
| H  | -3.2266854765 | -1.4259460492 | -3.1391759406 |
| H  | -4.6073405534 | -0.9178000938 | -2.1105691233 |
| C  | -1.0612444443 | 2.6433893270  | -0.0850311514 |
| O  | 0.0210688985  | 2.3894893854  | -0.7325345705 |
| O  | -1.6096405041 | 1.6997004238  | 0.5822107919  |
| C  | -1.6370479943 | 4.0280253611  | -0.1100496332 |
| H  | -2.6306922013 | 4.0483560618  | 0.3378068544  |
| H  | -1.6645045883 | 4.3999340598  | -1.1378028780 |
| H  | -0.9728275471 | 4.6930519996  | 0.4532273755  |

m/z 423, [Ho(acac-H)2(CH3COOH-trans)]+, +26.3 kJ/mol

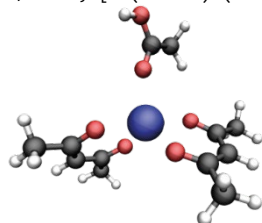

|    |               |               |               |
|----|---------------|---------------|---------------|
| Ho | 0.0622494384  | 0.0511943679  | -0.0978012633 |
| C  | 3.1181919372  | -1.1186225037 | 3.0108076642  |
| C  | 2.6607897285  | -0.6960372282 | 1.6436178810  |
| O  | 1.3895035483  | -0.4645586018 | 1.5218193258  |
| C  | 3.5729716723  | -0.5670010417 | 0.5872371440  |
| C  | 3.2386511650  | -0.1598459718 | -0.7218674309 |
| C  | 4.3015616483  | -0.0446031829 | -1.7789703705 |
| O  | 2.0380669515  | 0.1321229037  | -1.0829402095 |
| H  | 2.8388313111  | -0.3507892048 | 3.7408905826  |
| H  | 4.1948140850  | -1.2875860472 | 3.0577778138  |
| H  | 2.5943907918  | -2.0368236870 | 3.2997234569  |
| H  | 4.6126521386  | -0.7874748514 | 0.7938128095  |
| H  | 5.2964022126  | -0.2875335291 | -1.4032010364 |
| H  | 4.3041401835  | 0.9742326170  | -2.1818669577 |
| H  | 4.0549968714  | -0.7145563576 | -2.6103760523 |
| C  | -3.9590088184 | -1.0020230725 | 1.8095595922  |
| C  | -2.8383861147 | -1.1104983000 | 0.8114710722  |
| C  | -2.8477973407 | -2.1308799185 | -0.1593916010 |
| C  | -1.8540871067 | -2.3235243535 | -1.1324230982 |
| C  | -1.9714619092 | -3.4281554111 | -2.1441017768 |
| O  | -0.7936570178 | -1.5859991655 | -1.2232380219 |
| O  | -1.9024227607 | -0.2277754386 | 0.9028793057  |
| H  | -3.5458893433 | -1.0586768843 | 2.8227871727  |
| H  | -4.7108421406 | -1.7821974928 | 1.6830694276  |
| H  | -4.4403151863 | -0.0220820316 | 1.7142585027  |
| H  | -0.3414163598 | 4.1539290943  | -1.7796165208 |
| H  | -3.6873214576 | -2.8145648581 | -0.1599693218 |
| H  | -2.8883340809 | -4.0074094997 | -2.0271394943 |
| H  | -1.1068543960 | -4.0952387712 | -2.0530359837 |
| H  | -1.9373289662 | -3.0009320892 | -3.1524917082 |
| C  | -1.0904525953 | 3.3173712531  | -0.2533477223 |
| O  | -0.9713484526 | 4.3514045692  | -1.0618142903 |
| O  | -0.4582372362 | 2.2690178518  | -0.4649821674 |
| C  | -2.0036443210 | 3.5375463031  | 0.9077130069  |
| H  | -2.3069774586 | 2.5809380808  | 1.3337968348  |
| H  | -2.8704374657 | 4.1285995027  | 0.6041622802  |
| H  | -1.4628101554 | 4.1154629502  | 1.6672931545  |

m/z 423, [Ho(acac-H)(acac-enol)(CH3COO)]+, +36.1 kJ/mol

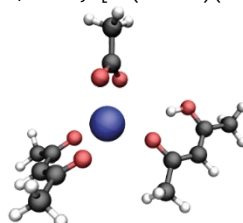

|    |               |               |               |
|----|---------------|---------------|---------------|
| Ho | 0.4196218240  | 0.3020215683  | -0.0862936010 |
| C  | -0.0881447216 | 2.8857244549  | -0.3910107980 |
| O  | 0.6286831319  | 2.2232476267  | -1.2327094233 |
| O  | -0.5852083142 | 2.2572283329  | 0.6091410950  |
| C  | -0.3034041426 | 4.3566260878  | -0.5721499641 |
| H  | -1.1854426259 | 4.6873586067  | -0.0227230669 |
| H  | -0.3806123678 | 4.6008027958  | -1.6335789838 |
| H  | 0.5722547133  | 4.8835632230  | -0.1743458884 |
| C  | 3.7561508053  | -0.7465462826 | 2.7535485130  |
| C  | 3.0360059076  | -0.7523213480 | 1.4366724978  |
| O  | 1.8724465135  | -0.1780862310 | 1.4255326230  |
| C  | 3.6068819601  | -1.3512154746 | 0.3024741126  |
| C  | 2.9922989258  | -1.4322622322 | -0.9619634258 |
| C  | 3.6843072874  | -2.1107206445 | -2.1092540419 |
| O  | 1.8217012638  | -0.9425980657 | -1.2084446317 |
| H  | 3.9127541212  | 0.2895303246  | 3.0747376568  |
| H  | 4.7177105246  | -1.2591439271 | 2.7064157790  |
| H  | 3.1264765420  | -1.2216315063 | 3.5140768319  |
| H  | 4.5866790881  | -1.7983570057 | 0.4129480972  |
| H  | 4.6509822973  | -2.5300880969 | -1.8276332362 |
| H  | 3.8265561361  | -1.3867219361 | -2.9198082685 |
| H  | 3.0429450342  | -2.9064332339 | -2.5039534686 |
| C  | -1.6112891571 | -3.0337193545 | -0.8274348057 |
| C  | -2.2963612896 | -1.7913043119 | -0.3385931198 |
| O  | -1.5633545172 | -0.7465914619 | -0.1110434476 |
| C  | -3.6857186183 | -1.7670191537 | -0.1286893682 |
| C  | -4.3869576671 | -0.6509690163 | 0.3321172629  |
| C  | -5.8606916528 | -0.6437316514 | 0.5481950697  |
| O  | -3.8024442086 | 0.4924330274  | 0.6147852845  |
| H  | -1.0164376764 | -2.8043692778 | -1.7185714197 |
| H  | -2.3178924150 | -3.8303349988 | -1.0629105089 |
| H  | -0.9192291558 | -3.3945902715 | -0.0567031231 |
| H  | -4.2521265739 | -2.6654134220 | -0.3352053538 |
| H  | -6.3117767259 | -1.6058999154 | 0.3061391829  |
| H  | -6.3156812644 | 0.1398221840  | -0.0683757116 |
| H  | -6.0743617190 | -0.3907454889 | 1.5929117219  |
| H  | -2.8340752631 | 0.4197860765  | 0.4542489282  |

m/z 463, [Ho(acac-H)2(acac-diketo)]+, +0.0 kJ/mol

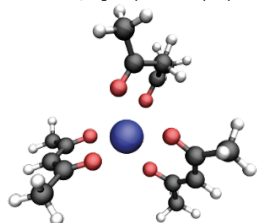

|    |               |               |               |
|----|---------------|---------------|---------------|
| Ho | -0.2066947606 | 0.0717275432  | 0.1575817321  |
| C  | -3.8085595192 | 0.5349986070  | -2.5656799539 |
| C  | -3.0855750012 | 0.1242232614  | -1.3115880523 |
| O  | -1.8157751692 | 0.3529943095  | -1.2920930726 |
| C  | -3.7866218244 | -0.4657870834 | -0.2452225139 |
| C  | -3.2048623222 | -0.8818693173 | 0.9676047672  |
| C  | -4.0540043850 | -1.4937110354 | 2.0491326499  |
| O  | -1.9479542585 | -0.7692504879 | 1.2258979016  |
| H  | -3.6745408899 | 1.6111242898  | -2.7230336394 |
| H  | -4.8747609989 | 0.3063569050  | -2.5299154481 |
| H  | -3.3569644048 | 0.0290152836  | -3.4261456860 |
| H  | -4.8535500916 | -0.6070563679 | -0.3643031365 |
| H  | -5.1038805750 | -1.5753672036 | 1.7636826683  |
| H  | -3.9725890007 | -0.8857630289 | 2.9571878573  |
| H  | -3.6665476129 | -2.4883303795 | 2.2960380142  |
| C  | 3.2009625143  | 2.2895610020  | -2.0202267458 |
| C  | 2.1093921919  | 2.0949510001  | -0.9980371224 |
| O  | 1.5912126930  | 0.9160725513  | -0.9372467990 |
| C  | 1.7202558119  | 3.1704609792  | -0.1785205920 |
| C  | 0.7200253921  | 3.1102202388  | 0.8090495420  |
| C  | 0.4148791718  | 4.3092843088  | 1.6643184708  |
| O  | 0.0174701464  | 2.0554028848  | 1.0397782261  |
| H  | 3.6036948064  | 3.3035659087  | -2.0188451644 |
| H  | 2.8051622271  | 2.0617413789  | -3.0162562774 |
| H  | 4.0167965408  | 1.5828617200  | -1.8291746046 |
| H  | 2.2381218510  | 4.1124553425  | -0.3086949120 |
| H  | 0.5352968728  | 4.0406751420  | 2.7196459834  |
| H  | -0.6346814746 | 4.5925479963  | 1.5268327430  |
| H  | 1.0524967162  | 5.1637339522  | 1.4327010156  |
| C  | 1.7672071187  | -3.7079347954 | -1.9595703847 |
| C  | 1.5767384540  | -2.5475903968 | -1.0331097045 |
| C  | 2.7535164204  | -2.1313458363 | -0.1537268059 |
| C  | 2.3705774101  | -1.8048132276 | 1.2864399456  |
| C  | 3.2357133773  | -2.3369421639 | 2.3857894090  |
| O  | 1.3844198125  | -1.1080348774 | 1.5260590113  |
| O  | 0.5152979786  | -1.9286845700 | -0.9874469724 |
| H  | 0.8821414812  | -3.8514175064 | -2.5796866439 |
| H  | 1.9683010443  | -4.6163828994 | -1.3773543828 |
| H  | 2.6485103139  | -3.5411329240 | -2.5911808418 |
| H  | 3.1185069348  | -1.1860803930 | -0.5898948086 |
| H  | 3.5630620911  | -2.8620506799 | -0.1962722748 |
| H  | 3.2113014950  | -3.4343454384 | 2.3735535467  |
| H  | 2.8950974158  | -1.9689045007 | 3.3537964611  |
| H  | 4.2800450052  | -2.0475444921 | 2.2156225945  |

m/z 463, [Ho(acac-H)2(acac-enol)]+, +10.1 kJ/mol

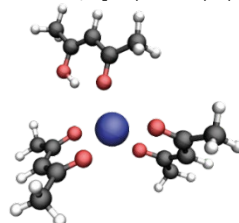

|    |               |               |               |
|----|---------------|---------------|---------------|
| Ho | -0.4736656948 | 0.0183047207  | 0.0780536799  |
| C  | -1.3346166482 | 3.8636118698  | 2.3027174517  |
| C  | -0.6737297373 | 3.0180976758  | 1.2501932332  |
| O  | -0.9568374564 | 1.7553383449  | 1.2829600320  |
| C  | 0.1916207554  | 3.5942068107  | 0.3065614763  |
| C  | 0.8821436323  | 2.8828788497  | -0.6948935499 |
| C  | 1.7987335023  | 3.6026980722  | -1.6459651495 |
| O  | 0.7806938626  | 1.6078369366  | -0.8538198634 |
| H  | -2.4226182834 | 3.7741621876  | 2.2076432218  |
| H  | -1.0515933975 | 4.9149029816  | 2.2342330808  |
| H  | -1.0701895295 | 3.4798465447  | 3.2943665681  |
| H  | 0.3514902555  | 4.6636269969  | 0.3623360375  |
| H  | 1.8634383066  | 4.6718581359  | -1.4390229411 |
| H  | 1.4397522516  | 3.4545941291  | -2.6708210379 |
| H  | 2.7995500164  | 3.1602237918  | -1.5922441563 |
| C  | -3.6062943604 | -2.9225897676 | 1.6322116592  |
| C  | -2.9261129773 | -2.0475784771 | 0.6148256675  |
| O  | -1.8384513805 | -1.4696127909 | 0.9928036253  |
| C  | -3.4761675674 | -1.8925912843 | -0.6735060940 |
| C  | -2.9215691294 | -1.1040099556 | -1.6942366114 |
| C  | -3.5739803464 | -1.0272653096 | -3.0461355087 |
| O  | -1.8406243923 | -0.4061555082 | -1.5501931427 |
| H  | -4.5063442450 | -3.3996923650 | 1.2418673412  |
| H  | -3.8690961188 | -2.3174136352 | 2.5072456406  |
| H  | -2.9079006529 | -3.6932006958 | 1.9767435406  |
| H  | -4.3902199561 | -2.4285089331 | -0.8962871884 |
| H  | -2.8572035468 | -1.3414818374 | -3.8129544965 |
| H  | -3.8339966297 | 0.0149344571  | -3.2630606402 |
| H  | -4.4708873696 | -1.6444584964 | -3.1141938371 |
| O  | 3.6906868731  | 0.0749983127  | -0.6334773605 |
| C  | 4.2951412968  | -1.0089149927 | -0.1913293629 |
| H  | 6.2183662929  | -0.1398570383 | 0.0551708662  |
| H  | 5.9626197139  | -0.9177812493 | -1.5044133668 |
| C  | 5.7668343456  | -1.0123365294 | -0.4303760140 |
| H  | 6.2368136019  | -1.9209180630 | -0.0539995395 |
| C  | 3.6233196873  | -2.0525848851 | 0.4405363489  |
| H  | 4.2083304234  | -2.9016241926 | 0.7685575887  |
| C  | 2.2331431564  | -2.0633365184 | 0.6764406926  |
| O  | 1.4897915007  | -1.0767608872 | 0.3079388151  |
| C  | 1.5760778095  | -3.2293574110 | 1.3560161402  |
| H  | 0.9648406351  | -2.8759540737 | 2.1931247203  |
| H  | 0.8984231184  | -3.7232505877 | 0.6492122783  |
| H  | 2.3007939114  | -3.9599570593 | 1.7173615532  |
| H  | 2.7226484704  | 0.0221927262  | -0.4560723984 |
